# Supplementary material
Source: ML conference proceedings conference paper supplement (https://openreview.net/forum?id=KLaDXLAzzFT)
Supplement: supplementary_material [file attachment]

# NEAR-OPTIMAL OFFLINE REINFORCEMENT LEARNING WITH LINEAR REPRESENTATION: LEVERAGING VARIANCE INFORMATION WITH PESSIMISM

**Anonymous authors**

Paper under double-blind review

## ABSTRACT

*Offline reinforcement learning*, which seeks to utilize offline/historical data to optimize sequential decision-making strategies, has gained surging prominence in recent studies. Due to the advantage that appropriate function approximators can help mitigate the sample complexity burden in modern reinforcement learning problems, existing endeavors usually enforce powerful function representation models (*e.g.* neural networks) to learn the optimal policies. However, a precise understanding of the statistical limits with function representations, remains elusive, even when such a representation is linear.

Towards this goal, we study the statistical limits of offline reinforcement learning with linear model representations. To derive the tight offline learning bound, we design the *variance-aware pessimistic value iteration* (VAPVI), which adopts the conditional variance information of the value function for time-inhomogeneous episodic linear Markov decision processes (MDPs). VAPVI uses the estimated variances of the value functions to reweight the Bellman residuals in the least-square pessimistic value iteration and provides improved offline learning bounds over the existing best-known results (whereas the Bellman residuals are equally weighted). More importantly, our learning bounds are expressed in terms of system quantities, which provide natural instance-dependent characterizations that previous results are short of. We hope our results draw a clearer picture of what offline learning should look like when linear representations are provided.

## 1 INTRODUCTION

*Offline reinforcement learning* (offline RL or batch RL [Lange et al. \(2012\)](#); [Levine et al. \(2020\)](#)) is the framework for learning a reward-maximizing policy in an unknown environment (*Markov Decision Process* or MDP)<sup>1</sup> using the logged data coming from some behavior policy  $\mu$ . Function approximations, on the other hand, are well-known for generalization in standard supervised learning. Offline RL with function representation/approximation, as a result, provides generalization across large state-action spaces for the challenging sequential decision-making problems when no iteration is allowed (as opposed to online learning). This paradigm is crucial to the success of modern RL problems as many deep RL algorithms find their prototypes in the literature of offline RL. For example, [Xie & Jiang \(2020\)](#) provides a view that *Fitted Q-Iteration* [Gordon \(1999\)](#); [Ernst et al. \(2005\)](#) can be considered as the theoretical prototype of the deep  $Q$ -networks algorithm (DQN) [Mnih et al. \(2015\)](#) with neural networks being the function representors. On the empirical side, there are a huge body of deep RL-based algorithms [Mnih et al. \(2015\)](#); [Silver et al. \(2017\)](#); [Fujimoto et al. \(2019\)](#); [Kumar et al. \(2019\)](#); [Wu et al. \(2019\)](#); [Kidambi et al. \(2020\)](#); [Yu et al. \(2020\)](#); [Kumar et al. \(2020\)](#); [Janner et al. \(2021\)](#); [Chen et al. \(2021a\)](#) that utilize function approximations to achieve respective successes in the offline regime. However, it is also realized that practical function approximation schemes can be quite sample inefficient (*e.g.* millions of samples are needed for deep  $Q$ -network to solve certain Atari games [Mnih et al. \(2015\)](#)).

<sup>1</sup>The environment could have other forms as well, *e.g.* *partially-observed MDP* (POMDP) or *non-markovian decision process* (NMDP).

To understand this phenomenon, there are numerous studies consider how to achieve sample efficiency with function approximation from the theoretical side, as researchers find sample efficient algorithms are possible with particular model representations, in either online RL (e.g. Yang & Wang (2019; 2020); Modi et al. (2020); Jin et al. (2020); Ayoub et al. (2020); Jiang et al. (2017); Du et al. (2019); Sun et al. (2019); Zanette et al. (2020); Zhou et al. (2021); Jin et al. (2021a); Du et al. (2021)) or offline RL (e.g. Munos (2003); Chen & Jiang (2019); Xie & Jiang (2020); Jin et al. (2021b); Xie et al. (2021a); Duan et al. (2021); Nguyen-Tang et al. (2021); Zanette et al. (2021)).

Among them, the linear MDP model (Yang & Wang, 2020; Jin et al., 2020), where the transition is represented as a linear combinations of the given  $d$ -dimensional feature, is (arguably) the most studied setting in function approximation and there are plenty of extensions based upon it (e.g. generalized linear model (Wang et al., 2021b), reward-free RL (Wang et al., 2020), gap-dependent analysis (He et al., 2021) or generative adversarial learning (Liu et al., 2021)). Given its prosperity, however, there are still unknowns for understanding function representations in RL, especially in the offline case.

- While there are surging researches in showing provable sample efficiency (polynomial sample complexity is possible) under a variety of function approximation schemes, how to improve the sample efficiency for a given class of function representations remains understudied. For instance, given a neural network approximation class, an algorithm that learns the optimal policy with complexity  $O(H^{10})$  is far worse than the one that can learn in  $O(H^3)$  sample complexity, despite that both algorithms are considered sample efficient. Therefore, how to achieve the “optimal”/tight sample complexity when function approximation is provided is a valuable question to consider. On the other hand, it is known that tight sample complexity, due to the limit of the existing statistical analysis tools, can be very tough to obtain when function representation has a very complicated form. However, does this mean tight analysis is not hopeful even when the representation is linear?
- Second, in the existing analysis of offline RL (with function approximation or simply the tabular MDPs), the learning bounds depend either explicitly on the data-coverage quantities (e.g. uniform concentrability coefficients Chen & Jiang (2019); Xie & Jiang (2020), uniform visitation measure Yin et al. (2021); Yin & Wang (2021a) and single concentrability Rashidinejad et al. (2021); Xie et al. (2021b)) or the horizon length  $H$  (Jin et al., 2021b; Uehara & Sun, 2021). While those results are valuable as they do not depend on the structure of the particular problem (therefore, remain valid even for pathological MDPs), in practice, the empirical performances of offline reinforcement learning are often far better than those non-adaptive bounds would indicate. Can the learning bounds reflect the nature of individual MDP instances when the MDP model has a certain function representation?

In this work, we think about offline RL from the above two aspects. In particular, we consider the fundamental linear model representations and ask the following question of interest:

*Can we achieve the statistical limits for offline RL when models have linear representations?*

## 1.1 RELATED THEORETICAL WORK

**Offline RL with general function representations.** The finite sample analysis of offline RL with function approximation is initially conducted by Fitted  $Q$ -Iteration (FQI) type algorithms and can be dated back to (Munos, 2003; Szepesvári & Munos, 2005; Antos et al., 2008a;b). Later, Chen & Jiang (2019); Le et al. (2019); Xie & Jiang (2020) follow this line of research and derive the improved learning results. However, owing to the aim for tackling general function approximation, those learning bounds are expressed in terms of the stringent *concentrability coefficients* (therefore, are less adaptive to individual instances) and are usually only *information-theoretical*, due to the computational intractability of the optimization procedure over the general function classes. Other works impose weaker assumptions (e.g. partial coverage (Liu et al., 2020; Kidambi et al., 2020; Uehara & Sun, 2021)), and their finite sample analysis are generally suboptimal in terms of  $H$  or the effective horizon  $(1 - \gamma)^{-1}$ .

**Offline RL with tabular models.** For tabular MDPs, tight learning bounds can be achieved under several data-coverage assumptions. For the class of problems with uniform data-visitation measure  $d_m$ , the near-optimal sample complexity bound has the rate  $O(H^3/d_m\epsilon^2)$  for time-inhomogeneous MDPs (Yin et al., 2021) and  $O(H^2/d_m\epsilon)$  for time-homogeneous MDPs (Yin & Wang, 2021a; Ren

et al., 2021). Under the single concentrability assumption, the tight rate  $O(H^3 SC^*/\epsilon^2)$  is obtained by Xie et al. (2021b). In particular, the recent study Yin & Wang (2021b) introduces the *intrinsic offline learning bound* that is not only instance-dependent but also subsumes previous optimal results.

**Offline RL with linear model representations.** Recently, there is more focus on studying the provable efficient offline RL under the linear model representations. Jin et al. (2021b) first shows offline RL with linear MDP is provably efficient by *the pessimistic value iteration*. Their analysis deviates from their lower bound by a factor of  $d \cdot H$  (check their Theorem 4.4 and 4.6). Later, Xie et al. (2021a) considers function approximation under the Bellman-consistent assumptions, and, when realized to linear MDP setting, improve the sample complexity guarantee of Jin et al. (2021b) by an order  $O(d)$  (Theorem 3.2).<sup>2</sup> However, their improvement only holds for finite action space (due to the dependence  $\log |\mathcal{A}|$ ) and by the direct reduction (from Theorem 3.1) their result does not imply a computationally tractable algorithm. Concurrently, Zanette et al. (2021) considers the Linear Bellman Complete model and designs the *actor-critic* style algorithm that achieves tight result under the assumption that the value function is bounded by 1. While their algorithm is efficient (which is based on solving a sequence of second-order cone programs), the resulting learning bound requires the action space to be finite due to the mirror descent updates in the *Actor* procedure (Agarwal et al., 2021). Besides, assuming the value function to be less than 1 simplifies the challenges in dealing with horizon  $H$  since when rescaling their result to  $[0, H]$ , there is a  $H$  factor blow-up, which makes no horizon improvement comparing to Jin et al. (2021b). On the other hand, Wang et al. (2021a); Zanette (2021) study the statistical hardness of offline RL with linear representations by proofing the exponential lower bounds. As a result, none of the existing algorithms can achieve the statistical limit for the well-structured linear MDP model with the general (infinite or continuous) state-action spaces.

**Variance-aware studies.** Talebi & Maillard (2018) first incorporate the variance structure in online tabular MDPs and Zanette & Brunskill (2019) tighten the result. For linear MDPs, Zhou et al. (2021) first uses variance structure to achieve the near-optimal result and the *Weighted OFUL* incorporates the variance structure explicitly in the regret bound. Recently, Variance-awareness is also considered in Zhang et al. (2021) for horizon-free setting and for OPE problem (Min et al., 2021).

## 1.2 OUR CONTRIBUTION

In this work, we study offline RL for time-inhomogeneous episodic linear Markov decision processes. Linear MDPs serve as one critical step towards understanding function approximation in RL since: **1.** unlike general function representation, linear MDP representation has the well-structured form by the given feature representors, which makes delicate statistical analysis hopeful; **2.** unlike tabular representation, which only works for finite models, linear MDP provides generalization as it adapts to infinite or continuous state-action spaces. Especially, we design the *variance-aware pessimistic value iteration* (VAPVI, Algorithm 1) which incorporates the conditional variance information of the value function and, by the variance structure, Theorem 3.2 is able to improve over the aforementioned state-of-the-art guarantees. In addition, we further improve the state-action guarantee by designing an even tighter bonus (3). VAPVI-Improved (Theorem 3.3) is near-minimax optimal as indicated by our lower bound (Theorem 3.5). Importantly, the resulting learning bounds from VAPVI/VAPVI-Improved are able to characterize the adaptive nature of individual instances and yield different convergence rates for different problems. Algorithmically, we use the estimated variances to reweight the Bellman residual learning objective so that the (training) samples with high uncertainty get less attention (Section 3). This is the key to obtaining instance-adaptive guarantees.

## 2 PRELIMINARIES

### 2.1 PROBLEM SETTINGS

**Episodic time-inhomogeneous linear Markov decision process.** A finite-horizon *Markov Decision Process* (MDP) is denoted as  $M = (\mathcal{S}, \mathcal{A}, P, r, H, d_1)$  (Sutton & Barto, 2018), where  $\mathcal{S}$  is the arbitrary state space and  $\mathcal{A}$  is the arbitrary action space which can be infinite or even continuous. A time-inhomogeneous transition kernel  $P_h : \mathcal{S} \times \mathcal{A} \mapsto \Delta^{\mathcal{S}}$  ( $\Delta^{\mathcal{S}}$  represents a probability simplex) maps each state action  $(s_h, a_h)$  to a probability distribution  $P_h(\cdot | s_h, a_h)$  and  $P_h$  can be different

<sup>2</sup>This comparison is based on translating their infinite horizon discounted setting to the finite-horizon case.

across time. In addition,  $r : \mathcal{S} \times \mathcal{A} \mapsto \mathbb{R}$  is the mean reward function satisfying  $0 \leq r \leq 1$ .  $d_1$  is the initial state distribution.  $H$  is the horizon. A policy  $\pi = (\pi_1, \dots, \pi_H)$  assigns each state  $s_h \in \mathcal{S}$  a probability distribution over actions according to the map  $s_h \mapsto \pi_h(\cdot | s_h) \forall h \in [H]$  and induces a random trajectory  $s_1, a_1, r_1, \dots, s_H, a_H, r_H, s_{H+1}$  with  $s_1 \sim d_1, a_h \sim \pi(\cdot | s_h), s_{h+1} \sim P_h(\cdot | s_h, a_h), \forall h \in [H]$ . In particular, we adopt the linear MDP protocol from Jin et al. (2020; 2021b), meaning that the transition kernel and the mean reward function admit linear structures in the feature map.

**Definition 2.1** (Linear MDPs). <sup>3</sup> An episodic MDP  $(\mathcal{S}, \mathcal{A}, H, P, r)$  is called a linear MDP with a known (unsigned) feature map  $\phi : \mathcal{S} \times \mathcal{A} \rightarrow \mathbb{R}^d$  if there exist  $d$  unknown (unsigned) measures  $\nu_h = (\nu_h^{(1)}, \dots, \nu_h^{(d)})$  over  $\mathcal{S}$  and an unknown vector  $\theta_h \in \mathbb{R}^d$  such that

$$P_h(s' | s, a) = \langle \phi(s, a), \nu_h(s') \rangle, \quad r_h(s, a) = \langle \phi(s, a), \theta_h \rangle, \quad \forall s', s \in \mathcal{S}, a \in \mathcal{A}, h \in [H].$$

where  $\|\nu_h(\mathcal{S})\|_2 \leq \sqrt{d}$  and  $\max(\|\phi(s, a)\|_2, \|\theta_h\|_2) \leq 1$  for all  $h \in [H]$  and  $\forall s, a \in \mathcal{S} \times \mathcal{A}$ .  $\|\mu_h(\mathcal{S})\| = \int_{\mathcal{S}} \|\mu_h(s)\| ds$ .

**V-values and Q-values.** For any policy  $\pi$ , the  $V$ -value functions  $V_h^\pi(\cdot) \in \mathbb{R}^{\mathcal{S}}$  and  $Q$ -value functions  $Q_h^\pi(\cdot, \cdot) \in \mathbb{R}^{\mathcal{S} \times \mathcal{A}}$  are defined as:  $V_h^\pi(s) = \mathbb{E}_\pi[\sum_{t=h}^H r_t | s_h = s]$ ,  $Q_h^\pi(s, a) = \mathbb{E}_\pi[\sum_{t=h}^H r_t | s_h = s, a_h = a]$ ,  $\forall s, a, h \in \mathcal{S}, \mathcal{A}, [H]$ . The performance measure is defined as  $v^\pi := \mathbb{E}_{d_1}[V_1^\pi] = \mathbb{E}_{\pi, d_1}[\sum_{t=1}^H r_t]$ . The Bellman (optimality) equations follow  $\forall h \in [H]: Q_h^\pi = r_h + P_h V_{h+1}^\pi$ ,  $V_h^\pi = \mathbb{E}_{a \sim \pi_h}[Q_h^\pi]$ ,  $Q_h^* = r_h + P_h V_{h+1}^*$ ,  $V_h^* = \max_a Q_h^*(\cdot, a)$  (where  $Q_h, V_h, P_h$  are vectors). By Definition 2.1, the  $Q$ -values also admit linear structures, i.e.  $Q_h^\pi = \langle \phi, w_h^\pi \rangle$  for some  $w_h^\pi \in \mathbb{R}^d$  (Lemma G.9). Lastly, for a policy  $\pi$ , we denote the induced occupancy measure over the state-action space at any time  $h \in [H]$  to be: for any  $E \subseteq \mathcal{S} \times \mathcal{A}$ ,  $d_h^\pi(E) := \mathbb{E}[(s_h, a_h) \in E | s_1 \sim d_1, a_i \sim \pi(\cdot | s_i), s_i \sim P_{i-1}(\cdot | s_{i-1}, a_{i-1}), 1 \leq i \leq h]$  and  $\mathbb{E}_{\pi, h}[f(s, a)] := \int_{\mathcal{S} \times \mathcal{A}} f(s, a) d_h^\pi(s, a) ds da$ . Here for notation simplicity we abuse  $d_h^\pi(\cdot)$  to denote either probability measure or density function.

**Offline learning setting.** The offline RL requires the agent to learn the policy  $\pi$  that maximizes  $v^\pi$ , provided with the historical data  $\mathcal{D} = \{(s_h^\tau, a_h^\tau, r_h^\tau, s_{h+1}^\tau)\}_{\tau \in [K], h \in [H]}$  rolled out from some behavior policy  $\mu$ . The offline nature requires we cannot change  $\mu$  and in particular we do not know the data generating distribution of  $\mu$ . To sum up, the agent seeks to find a policy  $\pi_{\text{alg}}$  such that  $v^* - v^{\pi_{\text{alg}}} \leq \epsilon$  for the given batch data  $\mathcal{D}$  and a given targeted accuracy  $\epsilon > 0$ .

## 2.2 ASSUMPTIONS

It is known that learning a near-optimal policy from the offline data  $\mathcal{D}$  cannot be sample efficient without certain data-coverage assumptions (Wang et al., 2021a; Yin & Wang, 2021b). To begin with, we define the population covariance matrix under the behavior policy  $\mu$  for all  $h \in [H]$ :

$$\Sigma_h^p := \mathbb{E}_{\mu, h}[\phi(s, a)\phi(s, a)^\top], \quad (1)$$

since  $\Sigma_h^p$  measure the coverage of state-action space for data  $\mathcal{D}$ , we make the following assumption.

**Assumption 2.2** (Feature Coverage). The data distributions  $\mu$  satisfy the minimum eigenvalue condition:  $\forall h \in [H]$ ,  $\kappa_h := \lambda_{\min}(\Sigma_h^p) > 0$  and denote  $\kappa = \min_h \kappa_h$ . Note  $\kappa$  is a system-dependent (non-universal) quantity as it is upper bounded by  $1/d$  (Assumption 2 in Wang et al. (2021a)).

We make this assumption for the following reasons. First of all, our offline learning guarantee (Theorem 3.2) provides simultaneously comparison to all the policies, which is stronger than competing with optimal policy only (whereas relaxed assumption suffices, e.g.  $\sup_{x \in \mathbb{R}^d} \frac{x \Sigma_{\pi^*} x^\top}{x \Sigma_{\mu} x^\top} < \infty$  (Uehara & Sun, 2021)). As a consequence, the behavior distribution  $\mu$  must be able to explore each feature dimension for the result to be valid. Second, even if Assumption 2.2 does not hold, we can always restrict our algorithmic design to the effective subspace of  $\Sigma_h^p$ , which causes the alternative notion of  $\kappa := \min_{h \in [H]} \{\kappa_h : s.t. \kappa_h > 0\}$ . In this scenario, learning the optimal policy cannot be guaranteed as a constant suboptimality gap needs to be suffered due to the lack of coverage and this is called *assumption-free RL* in Yin & Wang (2021b). Lastly, previous works analyzing the linear MDPs

<sup>3</sup>This definition is a standard extension over the tabular MDPs by referencing the similar notions from the bandit literature, i.e. from *Multi-armed Bandit* to *Linear Bandit* (Lattimore & Szepesvári, 2020).

impose very similar assumptions, *e.g.* Xie et al. (2021a) Theorem 3.2 where  $\Sigma_{\mathcal{D}}^{-1}$  exists and Min et al. (2021) for the OPE problem.

Next, for any function  $V_{h+1}(\cdot) \in [0, H - h]$ , we define the conditional variance  $\sigma_{V_{h+1}} : \mathcal{S} \times \mathcal{A} \rightarrow \mathbb{R}_+$  as  $\sigma_{V_{h+1}}(s, a)^2 := \max\{1, \text{Var}_{P_h}(V_{h+1})(s, a)\}$ .<sup>4</sup> Based on this definition, we can define the variance-involved population covariance matrices as:

$$\Lambda_h^p := \mathbb{E}_{\mu, h} [\sigma_{V_{h+1}}(s, a)^{-2} \phi(s, a) \phi(s, a)^\top].$$

In particular, when  $V_h = V_h^*$ , we use the notation  $\Lambda_h^{*p}$  instead. Since  $\sup_{(s, a) \in \mathcal{S} \times \mathcal{A}} \sigma_{V_h}(s, a)^2 \leq H^2$ , then by Assumption 2.2 we directly have the following corollary.

**Corollary 2.3.** Define  $\iota_h := \lambda_{\min}(\Lambda_h^p)$ ,  $\iota := \min_h \iota_h$ . Then  $\iota_h \geq \frac{\kappa_h}{H^2} > 0 \forall h \in [H]$ , and  $\iota > 0$ .

### 3 ALGORITHM

Least square regression is usually considered as one of “the default tools” for solving with problems with linear structures (*e.g.* LinUCB algorithm for linear Bandits) and finds its popularity in RL as well since *Least-Square Value Iteration* (LSVI, Jin et al. (2020)) is shown to be provably efficient for linear MDPs, due to that  $V_{h+1}(s')$  is an unbiased estimator of  $[P_h V_{h+1}](s, a)$ . Concretely, it solves the ridge regression problems at each time steps (with  $\lambda > 0$  being the regularization parameter):

$$\hat{w}_h := \underset{w \in \mathbb{R}^d}{\operatorname{argmin}} \lambda \|w\|_2^2 + \sum_{k=1}^K \left[ \langle \phi(s_h^k, a_h^k), w \rangle - r_h^k - V_{h+1}(s_{h+1}^k) \right]^2 \quad (2)$$

and has the closed-form solution  $\hat{w}_h = \Sigma_h^{-1} \sum_{k=1}^K \phi(s_h^k, a_h^k) [r_{k,h} + V_{h+1}(s_{h+1}^k)]$  with  $\Sigma_h^{-1} = \sum_{k=1}^K \phi(s_h^k, a_h^k) \phi(s_h^k, a_h^k)^\top + \lambda I$ . In offline RL, this has also been used in *pessimistic value iteration* (Jin et al., 2021b) and *fitted Q-evaluation* (Duan et al., 2020). Nevertheless, LSVI could only yield suboptimal guarantees, as illustrated by the following example.

**Example 3.1.** Instantiate PEVI (Theorem 4.4 in Jin et al. (2021b)) with  $\phi(s, a) = \mathbf{1}_{s,a}$  (*i.e.* tabular MDPs)<sup>5</sup>, by direct calculation the learning bound has the form  $O(dH \cdot \sum_{h,s,a} d_h^{\pi^*}(s, a) \sqrt{\frac{1}{K \cdot d_h^\mu(s, a)}})$

and the optimal result (Yin & Wang (2021b) Theorem 4.1) gives  $O(\sum_{h,s,a} d_h^{\pi^*}(s, a) \sqrt{\frac{\text{Var}_{P_{s,a}}(r + V_{h+1}^*)}{K \cdot d_h^\mu(s, a)}})$ .

The former has the horizon dependence  $H^2$  and the latter is  $H^{3/2}$  by law of total variance.

**Motivation.** By comparing the above two expressions, it can be seen that PEVI cannot get rid of the explicit  $H$  factor due to missing the variance information (*w.r.t*  $V^*$ ). If we go deeper, one could find that it might not be all that ideal to put equal weights on all the training samples in the least square objective (2), since, unlike linear regression where the randomness coming from one source distribution, we are regressing over a sequence of distributions in RL (*i.e.* each  $s_h, a_h$  corresponds to a different distribution  $P(\cdot | s_h, a_h)$  and there are possibly infinite many of them). Therefore, conceptually, the sample piece  $(s_h, a_h, s_{h+1})$  that has higher variance distribution  $P(\cdot | s_h, a_h)$  tends to be less “reliable” than the one  $(s'_h, a'_h, s'_{h+1})$  with lower variance (hence should not have equal weight in (2)). This suggests reweighting scheme might help improve the learning guarantee and reweighting over the variance of the value function stands as a natural choice.

#### 3.1 VARIANCE-AWARE PESSIMISTIC VALUE ITERATION

Now we explain our framework that incorporates the variance information. By the offline nature, we can use the independent episodic data  $\mathcal{D}' = \{(\bar{s}_h^\tau, \bar{a}_h^\tau, \bar{r}_h^\tau, \bar{s}_{h+1}^\tau)\}_{\tau \in [K]}^{h \in [H]}$  (from  $\mu$ ) to estimate the conditional variance of any  $V$ -values  $V_{h+1}$  via the definition  $[\text{Var}_h V_{h+1}](s, a) = [P_h(V_{h+1}^2)](s, a) - ([P_h V_{h+1}](s, a))^2$ . For the second order moment, by Definition 2.1, it holds

$$[P_h V_{h+1}^2](s, a) = \int_{\mathcal{S}} V_{h+1}^2(s') dP_h(s' | s, a) = \phi(s, a)^\top \int_{\mathcal{S}} V_{h+1}^2(s') d\nu_h(s').$$

<sup>4</sup>The  $\max(1, \cdot)$  applied here is for technical reason only. In general, it suffices to think  $\sigma_{V_{h+1}}^2 \approx \text{Var}_h V_{h+1}$ .

<sup>5</sup>This provides a valid illustration since tabular MDP is a special case of linear MDPs.

Denote  $\beta_h := \int_S V_{h+1}^2(s') d\nu_h(s')$ , then  $P_h V_{h+1}^2 = \langle \phi, \beta_h \rangle$  and we can estimator it via:

$$\bar{\beta}_h = \operatorname{argmin}_{\beta \in \mathbb{R}^d} \sum_{k=1}^K [\langle \phi(\bar{s}_h^k, \bar{a}_h^k), \beta \rangle - V_{h+1}^2(\bar{s}_{h+1}^k)]^2 + \lambda \|\beta\|_2^2 = \bar{\Sigma}_h^{-1} \sum_{k=1}^K \phi(\bar{s}_h^k, \bar{a}_h^k) V_{h+1}^2(\bar{s}_{h+1}^k)$$

and, similarly, the first order moment  $P_h V_{h+1} := \langle \phi, \theta_h \rangle$  can be estimated via:

$$\bar{\theta}_h = \operatorname{argmin}_{\theta \in \mathbb{R}^d} \sum_{k=1}^K [\langle \phi(\bar{s}_h^k, \bar{a}_h^k), \theta \rangle - V_{h+1}(\bar{s}_{h+1}^k)]^2 + \lambda \|\theta\|_2^2 = \bar{\Sigma}_h^{-1} \sum_{k=1}^K \phi(\bar{s}_h^k, \bar{a}_h^k) V_{h+1}(\bar{s}_{h+1}^k)$$

The final estimator is defined as  $\hat{\sigma}_{\bar{V}_h}^2(\cdot, \cdot) := \max\{1, \widehat{\text{Var}}_h V_{h+1}(\cdot, \cdot)\}$  with  $\widehat{\text{Var}}_h V_{h+1}(\cdot, \cdot) = \langle \phi(\cdot, \cdot), \bar{\beta}_h \rangle_{[0, (H-h+1)^2]} - [\langle \phi(\cdot, \cdot), \bar{\theta}_h \rangle_{[0, H-h+1]}]^2$ .<sup>6</sup> In particular, when setting  $V_{h+1} = \hat{V}_{h+1}$ , it recovers  $\hat{\sigma}_h$  in Algorithm 1 line 8. Here  $\bar{\Sigma}_h = \sum_{\tau=1}^K \phi(\bar{s}_h^\tau, \bar{a}_h^\tau) \phi(\bar{s}_h^\tau, \bar{a}_h^\tau)^\top + \lambda I_d$ .

**Variance-weighted LSVI.** The idea of LSVI (2) is based on approximate the Bellman updates:  $\mathcal{T}_h(V)(s, a) = r_h(s, a) + (P_h V)(s, a)$ . With variance estimator  $\hat{\sigma}_h$  at hand, we can modify (2) to solve the variance-weighted LSVI instead (Line 10 of Algorithm 1)

$$\hat{w}_h := \operatorname{argmin}_{w \in \mathbb{R}^d} \lambda \|w\|_2^2 + \sum_{k=1}^K \frac{[\langle \phi(s_h^k, a_h^k), w \rangle - r_h^k - \hat{V}_{h+1}(s_{h+1}^k)]^2}{\hat{\sigma}_h^2(s_h^k, a_h^k)} = \hat{\Lambda}_h^{-1} \sum_{k=1}^K \frac{\phi(s_h^k, a_h^k) \cdot [r_h^k + \hat{V}_{h+1}(s_{h+1}^k)]}{\hat{\sigma}_h^2(s_h^k, a_h^k)}$$

where  $\hat{\Lambda}_h = \sum_{k=1}^K \phi(s_h^k, a_h^k) \phi(s_h^k, a_h^k)^\top / \hat{\sigma}_h^2(s_h^k, a_h^k) + \lambda I_d$ . The estimated Bellman update  $\hat{\mathcal{T}}_h$  (acts on  $\hat{V}_{h+1}$ ) is defined as:  $(\hat{\mathcal{T}}_h \hat{V}_{h+1})(\cdot, \cdot) = \phi(\cdot, \cdot)^\top \hat{w}_h$  and the pessimism  $\Gamma_h$  is assigned to update  $\hat{Q}_h \approx \hat{\mathcal{T}}_h \hat{V}_{h+1} - \Gamma_h$ , i.e. Bellman update + Pessimism (Line 12-13 in Algorithm 1).

**Tighter Pessimistic Design.** To improve the learning guarantee, we create a tighter penalty design that includes  $\hat{\Lambda}_h^{-1}$  rather than  $\bar{\Sigma}_h^{-1}$  and an extra higher order  $O(\frac{1}{K})$  term:

$$\Gamma_h \leftarrow O\left(\sqrt{d} \cdot (\phi(\cdot, \cdot)^\top \hat{\Lambda}_h^{-1} \phi(\cdot, \cdot))^{1/2}\right) + \frac{2H^3 \sqrt{d}}{K}$$

Note such a design admits no explicit factor in  $H$  in the main term (as opposed to Jin et al. (2021b)) therefore it is the key for achieving adaptive/problem-dependent results (as we shall discuss later). The full algorithm VAPVI is stated in Algorithm 1. In particular, we halve the offline data into two independent parts with  $\mathcal{D} = \{(s_h^\tau, a_h^\tau, r_h^\tau, s_{h+1}^\tau)\}_{\tau \in [K]}^{h \in [H]}$  and  $\mathcal{D}' = \{(\bar{s}_h^\tau, \bar{a}_h^\tau, \bar{r}_h^\tau, \bar{s}_{h+1}^\tau)\}_{\tau \in [K]}^{h \in [H]}$  for different purposes (estimating variance and updating  $Q$ -values).

### 3.2 MAIN RESULT

We denote quantities  $\mathcal{M}_1, \mathcal{M}_2, \mathcal{M}_3, \mathcal{M}_4$  as in the notation list A. Then VAPVI provides the following result. The complete proof is provided in Appendix C.

**Theorem 3.2.** *Let  $K$  be the number of episodes. If  $K > \max\{\mathcal{M}_1, \mathcal{M}_2, \mathcal{M}_3, \mathcal{M}_4\}$  and  $\sqrt{d} > \xi$ , where  $\xi := \sup_{V \in [0, H], s' \sim P_h(s, a), h \in [H]} \left| \frac{r_h + V(s') - (\mathcal{T}_h V)(s, a)}{\sigma_V(s, a)} \right|$ . Then for any  $0 < \lambda < \kappa$ , with probability  $1 - \delta$ , for all policy  $\pi$  simultaneously, the output  $\hat{\pi}$  of Algorithm 1 satisfies*

$$v^\pi - v^{\hat{\pi}} \leq \tilde{O}(\sqrt{d} \cdot \sum_{h=1}^H \mathbb{E}_\pi \left[ \sqrt{\phi(\cdot, \cdot)^\top \Lambda_h^{-1} \phi(\cdot, \cdot)} \right]) + \frac{2H^4 \sqrt{d}}{K}$$

where  $\Lambda_h = \sum_{k=1}^K \frac{\phi(s_h^k, a_h^k) \cdot \phi(s_h^k, a_h^k)^\top}{\sigma_{\hat{V}_{h+1}}^2(s_h^k, a_h^k)} + \lambda I_d$ . In particular, we have with probability  $1 - \delta$ ,

$$v^* - v^{\hat{\pi}} \leq \tilde{O}(\sqrt{d} \cdot \sum_{h=1}^H \mathbb{E}_{\pi^*} \left[ \sqrt{\phi(\cdot, \cdot)^\top \Lambda_h^{*-1} \phi(\cdot, \cdot)} \right]) + \frac{2H^4 \sqrt{d}}{K}$$

where  $\Lambda_h^* = \sum_{k=1}^K \frac{\phi(s_h^k, a_h^k) \cdot \phi(s_h^k, a_h^k)^\top}{\sigma_{V_{h+1}^*}^2(s_h^k, a_h^k)} + \lambda I_d$  and  $\tilde{O}$  hides universal constants and the Polylog terms.

<sup>6</sup>The truncation used here is a standard treatment for making the estimator to be within the valid range.

**Algorithm 1** Variance-Aware Pessimistic Value Iteration (VAPVI)

- 
- 1: **Input:** Dataset  $\mathcal{D} = \{(s_h^\tau, a_h^\tau, r_h^\tau)\}_{\tau,h=1}^{K,H}$   $\mathcal{D}' = \{(\bar{s}_h^\tau, \bar{a}_h^\tau, \bar{r}_h^\tau)\}_{\tau,h=1}^{K,H}$ . Universal constant  $C$ .
  - 2: **Initialization:** Set  $\widehat{V}_{H+1}(\cdot) \leftarrow 0$ .
  - 3: **for**  $h = H, H-1, \dots, 1$  **do**
  - 4:   Set  $\bar{\Sigma}_h \leftarrow \sum_{\tau=1}^K \phi(\bar{s}_h^\tau, \bar{a}_h^\tau) \phi(\bar{s}_h^\tau, \bar{a}_h^\tau)^\top + \lambda I$
  - 5:   Set  $\bar{\beta}_h \leftarrow \bar{\Sigma}_h^{-1} \sum_{\tau=1}^K \phi(\bar{s}_h^\tau, \bar{a}_h^\tau) \cdot \widehat{V}_{h+1}(\bar{s}_{h+1}^\tau)^2$
  - 6:   Set  $\bar{\theta}_h \leftarrow \bar{\Sigma}_h^{-1} \sum_{\tau=1}^K \phi(\bar{s}_h^\tau, \bar{a}_h^\tau) \cdot \widehat{V}_{h+1}(\bar{s}_{h+1}^\tau)$
  - 7:   Set  $[\widehat{\text{Var}}_h \widehat{V}_{h+1}](\cdot, \cdot) = \langle \phi(\cdot, \cdot), \bar{\beta}_h \rangle_{[0, (H-h+1)^2]} - [\langle \phi(\cdot, \cdot), \bar{\theta}_h \rangle_{[0, H-h+1]}]^2$
  - 8:   Set  $\widehat{\sigma}_h(\cdot, \cdot)^2 \leftarrow \max\{1, \widehat{\text{Var}}_{P_h} \widehat{V}_{h+1}(\cdot, \cdot)\}$
  - 9:   Set  $\widehat{\Lambda}_h \leftarrow \sum_{\tau=1}^K \phi(s_h^\tau, a_h^\tau) \phi(s_h^\tau, a_h^\tau)^\top / \widehat{\sigma}^2(s_h^\tau, a_h^\tau) + \lambda \cdot I$ ,
  - 10:   Set  $\widehat{w}_h \leftarrow \widehat{\Lambda}_h^{-1} \left( \sum_{\tau=1}^K \phi(s_h^\tau, a_h^\tau) \cdot (r_h^\tau + \widehat{V}_{h+1}(s_{h+1}^\tau)) / \widehat{\sigma}^2(s_h^\tau, a_h^\tau) \right)$
  - 11:   Set  $\Gamma_h(\cdot, \cdot) \leftarrow C\sqrt{d} \cdot \left( \phi(\cdot, \cdot)^\top \widehat{\Lambda}_h^{-1} \phi(\cdot, \cdot) \right)^{1/2} + \frac{2H^3\sqrt{d}}{K}$    (Use  $\Gamma_h^I$  for the improved version)
  - 12:   Set  $\bar{Q}_h(\cdot, \cdot) \leftarrow \phi(\cdot, \cdot)^\top \widehat{w}_h - \Gamma_h(\cdot, \cdot)$
  - 13:   Set  $\widehat{Q}_h(\cdot, \cdot) \leftarrow \min\{\bar{Q}_h(\cdot, \cdot), H-h+1\}^+$
  - 14:   Set  $\widehat{\pi}_h(\cdot | \cdot) \leftarrow \arg \max_{\pi_h} \langle \widehat{Q}_h(\cdot, \cdot), \pi_h(\cdot | \cdot) \rangle_{\mathcal{A}}$ ,  $\widehat{V}_h(\cdot) \leftarrow \max_{\pi_h} \langle \widehat{Q}_h(\cdot, \cdot), \pi_h(\cdot | \cdot) \rangle_{\mathcal{A}}$
  - 15: **end for**
  - 16: **Output:**  $\{\widehat{\pi}_h\}_{h=1}^H$ .
- 

Theorem 3.2 provides several improvements over the existing best-known results and we now explain it. However, before that, we first discuss about our theorem condition.

**Comparing to Zhou et al. (2021).** In the online regime, Zhou et al. (2021) is the first result that achieves optimal regret rate with  $O(dH\sqrt{T})$  in the linear (mixture) MDPs. However, this tight rate is achieved based on the condition  $d \geq H$  (see their Theorem 6 and Remark 7). In offline RL, VAPVI only requires a milder condition  $\sqrt{d} > \xi$  comparing to  $d \geq H$  (since for any fixed  $V \in [0, H]$ , the standardized quantity  $\frac{r+V(s')-(T_h V)(s,a)}{\sigma_V(s,a)}$  is bounded by constant with high probability, *e.g.* by chebyshev inequality), which makes our result apply to a wider range of linear MDPs.

**Comparing to Jin et al. (2021b).** Jin et al. (2021b) first shows *pessimistic value iteration* (PEVI) is provably efficient for Linear MDPs in offline RL. VAPVI improves PEVI over  $O(\sqrt{d})$  on the feature dimension, and improves the horizon dependence as  $\Lambda_h \succcurlyeq \frac{1}{H^2} \Sigma_h$  implies  $\Lambda_h^{-1} \preccurlyeq H^2 \Sigma_h^{-1}$ . In addition, when instantiate to the tabular case, *i.e.*  $\phi(s, a) = \mathbf{1}_{s,a}$ , VAPVI gives  $O(\sqrt{d} \sum_{h,s,a} d_h^{\pi^*}(s, a) \sqrt{\frac{\text{Var}_{P_{s,a}}(r+V_{h+1}^*)}{K \cdot d_h^{\mu}(s,a)}})$ , which enjoys  $O(\sqrt{H})$  improvement over PEVI (recall Example 3.1) and the order  $O(H^{3/2})$  is tight (check Section F for the detailed derivation).

**Comparing to Xie et al. (2021a).** Their linear MDP guarantee in Theorem 3.2. enjoys the same rate as VAPVI in feature dimension but the horizon dependence is essentially the same as Jin et al. (2021b) (by translating  $H \approx O(\frac{1}{1-\gamma})$ ) therefore is not optimal. Their general function approximation scheme provides nice characterizations for on-support error and off-support error, but the algorithmic framework is information-theoretical only (and the practical version PSPI will not yield the same learning guarantee). Also, due to the use finite function class and policy class, the reduction to linear MDP only works with finite action space. As a comparison, VAPVI has no constraints on any of these.

**Comparing to Zanette et al. (2021).** Concurrently, Zanette et al. (2021) considers offline RL with the linear Bellman complete model, which is more general than linear MDPs and with the assumption  $Q^\pi \leq 1$ , and their PACLE algorithm provides near-minimax optimal guarantee in this setting. However, when recovering to the standard setting  $Q^\pi \in [0, H]$ , their bound will rescale by an  $H$  factor,<sup>7</sup> which is suboptimal due to the variance-unawareness. The reason behind this is: when  $Q^\pi \leq 1$ , lack of variance information encoding will not matter, since in this case  $\text{Var}_P(V^\pi) \leq 1$  has constant order (therefore will not affect the optimal rate); when  $Q^\pi \in [0, H]$ ,  $\text{Var}_P(V^\pi)$  can be as large as  $H^2$ , effectively leveraging the variance information can help improve the sample efficiency,

<sup>7</sup>Check their Footnote 2 in Page 9.

e.g. via law of total variances, just like VAPVI does. On the other hand, their guarantee also requires finite action space, due to the mirror descent style analysis. Nevertheless, we do point out [Zanette et al. \(2021\)](#) has improved state-action measure than VAPVI, as  $\|E_\pi[\phi(\cdot, \cdot)]\|_{M^{-1}} \leq \mathbb{E}_\pi[\|\phi(\cdot, \cdot)\|_{M^{-1}}]$  by Jensen's inequality and that norm  $\|\cdot\|_{M^{-1}}$  is convex for some positive-definite matrix  $M$ .

**Adaptive characterization and faster convergence.** Comparing to existing works, one major improvement is that the main term for VAPVI  $\sqrt{d} \sum_{h=1}^H \mathbb{E}_{\pi^*} [\sqrt{\phi(\cdot, \cdot)^\top \Lambda_h^{*-1} \phi(\cdot, \cdot)}]$  admits no explicit dependence on  $H$ , which provides a more adaptive/instance-dependent characterization. For instance, if we ignore the technical treatment by taking  $\lambda = 0$  and  $\sigma_h^* \approx \text{Var}_P(V_{h+1}^*)$ , then for the **partially deterministic systems** (where there are  $t$  stochastic  $P_h$ 's and  $H - t$  deterministic  $P_h$ 's), the main term diminishes to  $\sqrt{d} \sum_{i=1}^t \mathbb{E}_{\pi^*} [\sqrt{\phi(\cdot, \cdot)^\top \Lambda_{h_i}^{*-1} \phi(\cdot, \cdot)}]$  with  $h_i \in \{h : \text{s.t. } P_h \text{ is stochastic}\}$  and can be a much smaller quantity when  $t \ll H$ . Furthermore, for the **fully deterministic system**, VAPVI automatically provides faster convergence rate  $O(\frac{1}{K})$  from the higher order term, given that the main term degenerates to 0. Those adaptive/instance-dependent features are not enjoyed by ([Xie et al., 2021a](#); [Zanette et al., 2021](#)), as they always provide the standard statistical rate  $O(\frac{1}{\sqrt{K}})$  (also check Remark C.9 for a related discussion).

### 3.3 VAPVI-IMPROVED: FURTHER IMPROVEMENT IN STATE-ACTION DIMENSION

Can we further improve the VAPVI? Indeed, by deploying a carefully tuned tighter penalty, we are able to further improve the state-action dependence if the feature is non-negative ( $\phi \geq 0$ ). Concretely, we replace the following  $\Gamma_h^I$  in Algorithm 1 instead, and call the algorithm VAPVI-Improved (or VAPVI-I for short). The proof can be bound in Appendix D.

$$\Gamma_h^I(s, a) \leftarrow \phi(s, a)^\top \left| \hat{\Lambda}_h^{-1} \sum_{\tau=1}^K \frac{\phi(s_h^\tau, a_h^\tau) \cdot (r_h^\tau + \hat{V}_{h+1}(s_{h+1}^\tau) - (\hat{T}_h \hat{V}_{h+1})(s_h^\tau, a_h^\tau))}{\hat{\sigma}_h^2(s_h^\tau, a_h^\tau)} \right| + \tilde{O}(\frac{H^3 d / \kappa}{K}) \quad (3)$$

**Theorem 3.3.** *Let  $K$  be the number of episodes. If  $K > \max\{\mathcal{M}_1, \mathcal{M}_2, \mathcal{M}_3, \mathcal{M}_4\}$  and  $\sqrt{d} > \xi$ . Deploying  $\Gamma_h^I$  (3) in Algorithm 1. Then for any  $0 < \lambda < \kappa$ , with probability  $1 - \delta$ , for all policy  $\pi$  simultaneously, the output  $\hat{\pi}$  of Algorithm 1 (VAPVI-I) satisfies*

$$v^\pi - v^{\hat{\pi}} \leq \tilde{O}(\sqrt{d} \cdot \sum_{h=1}^H \sqrt{\mathbb{E}_\pi[\phi(\cdot, \cdot)^\top \Lambda_h^{-1} \mathbb{E}_\pi[\phi(\cdot, \cdot)]]) + \tilde{O}(\frac{H^4 d / \kappa}{K})$$

In particular, when choosing  $\pi = \pi^*$ , the above guarantee holds true with  $\Lambda_h^{-1}$  replaced by  $\Lambda_h^{*-1}$ . Here  $\Lambda_h^{-1}$ ,  $\Lambda_h^{*-1}$ ,  $\xi$  are defined the same as Theorem 3.2.

Theorem 3.3 maintains nearly all the features of Theorem 3.2 (except higher order term is slightly worse) and the dominate term evolves from  $\mathbb{E}_\pi \|\phi\|_{\Lambda_h^{-1}}$  to  $\|\mathbb{E}_\pi[\phi]\|_{\Lambda_h^{-1}}$ . Clearly, the two bounds differ by the magnitude of Jensen's inequality. To provide a concrete view of how much improvement is made, we check the parameter dependence in the context of tabular MDPs (where we ignore the higher order term for conciseness). In particular, we consider the following assumption for our discussion.

**Assumption 3.4** ([Rashidinejad et al. \(2021\)](#); [Xie et al. \(2021b\)](#)). *There exists a optimal policy  $\pi^*$ , s.t.  $\sup_{h,s,a} d_h^{\pi^*}(s, a) / d_h^\mu(s, a) := C^* < \infty$ , where  $d^\pi$  is the marginal state-action probability under  $\pi$ .*

In tabular RL,  $\phi(s, a) = \mathbf{1}_{s,a}$  and  $d = S \cdot A$  ( $S, A$  be the finite state, action cardinality), then

$$\begin{aligned} \text{Theorem 3.2} &\rightarrow \sqrt{SA} \sum_h \sum_{s,a} d_h^{\pi^*}(s, a) \sqrt{\frac{\text{Var}_{P_{s,a}}(r + V_{h+1}^*)}{K \cdot d_h^\mu(s, a)}} \leq \sqrt{\frac{H^3 C^* S^2 A}{K}}; \\ \text{Theorem 3.3} &\rightarrow \sqrt{SA} \sum_h \sqrt{\sum_{s,a} d_h^{\pi^*}(s, a)^2 \frac{\text{Var}_{P_{s,a}}(r + V_{h+1}^*)}{K \cdot d_h^\mu(s, a)}} \leq \sqrt{\frac{H^3 C^* S A}{K}}. \end{aligned} \quad (4)$$

Theorem 3.3 enjoys a  $S$  state improvement over Theorem 3.2 and nearly recovers the minimax rate  $\sqrt{\frac{H^3 C^* S}{K}}$  ([Xie et al., 2021b](#)). The detailed derivation can be found in Appendix F. Also, to show our result is near-optimal, we provide the corresponding lower bound. The proof is in Appendix E.

**Theorem 3.5** (Minimax lower bound). *There exist a pair of universal constants  $c, c' > 0$  such that given dimension  $d$ , horizon  $H$  and sample size  $K > c'd^3$ , one can always find a family of linear MDP instances  $\mathcal{M}$  such that (where  $\Lambda_h^* = \sum_{k=1}^K \frac{\phi(s_h^k, a_h^k) \cdot \phi(s_h^k, a_h^k)^\top}{\text{Var}_h(V_{h+1}^*(s_h^k, a_h^k))}$  satisfies  $(\Lambda_h^*)^{-1}$  exists  $\forall M \in \mathcal{M}$ )*

$$\inf_{\hat{\pi}} \sup_{M \in \mathcal{M}} \mathbb{E}_M[v^* - v^{\hat{\pi}}] / \sqrt{d} \cdot \sum_{h=1}^H \sqrt{\mathbb{E}_{\pi^*}[\phi]^\top (\Lambda_h^*)^{-1} \mathbb{E}_{\pi^*}[\phi]} \geq c. \quad (5)$$

Theorem 3.5 nearly matches the main term in VAPVI-I (Theorem 3.3) and certifies it is near-optimal.

## 4 PROOF OVERVIEW

Due to the space constraint, we could only provide a brief overview of the key proving ideas of the theorems. We begin with Theorem 3.2. First, by the *extended value difference lemma* (Lemma G.7), we can convert bounding the suboptimality gap of  $v^* - v^{\hat{\pi}}$  to bounding  $\sum_{h=1}^H 2 \cdot \mathbb{E}_{\pi} [\Gamma_h(s_h, a_h)]$ , given that  $|(\mathcal{T}_h \hat{V}_{h+1} - \hat{\mathcal{T}}_h \hat{V}_{h+1})(s, a)| \leq \Gamma_h(s, a)$  for all  $s, a, h$ . To bound  $\mathcal{T}_h \hat{V}_{h+1} - \hat{\mathcal{T}}_h \hat{V}_{h+1}$ , by decomposing it reduces to bounding the key quantity

$$\phi(s, a)^\top \hat{\Lambda}_h^{-1} \left[ \sum_{\tau=1}^K \phi(s_h^\tau, a_h^\tau) \cdot \left( r_h^\tau + \hat{V}_{h+1}(s_{h+1}^\tau) - (\mathcal{T}_h \hat{V}_{h+1})(s_h^\tau, a_h^\tau) \right) / \hat{\sigma}_h^2(s_h^\tau, a_h^\tau) \right] \quad (6)$$

The term is treated in two steps. First, we bound the gap of  $\|\sigma_{\hat{V}_{h+1}}^2 - \hat{\sigma}_h^2\|$  so we can convert  $\hat{\sigma}_h^2$  to  $\sigma_{\hat{V}_{h+1}}^2$ . Next, since  $\text{Var} \left[ r_h^\tau + \hat{V}_{h+1}(s_{h+1}^\tau) - (\mathcal{T}_h \hat{V}_{h+1})(s_h^\tau, a_h^\tau) \mid s_h^\tau, a_h^\tau \right] \approx \sigma_{\hat{V}_{h+1}}^2$ , therefore by the variance-weighted scheme in (equation 6), we can leverage the recent technical development *Bernstein inequality for self-normalized martingale* (Lemma G.3) for acquiring the tight result, in contrast to the previous treatment of Hoeffding inequality for self-normalized martingale + Covering.<sup>8</sup> For the second part, one needs to further convert  $\sigma_{\hat{V}_{h+1}}^2$  to  $\sigma_h^{*2}$  ( $\Lambda_h^{-1}$  to  $\Lambda_h^{*-1}$ ) with appropriate concentrations. The proof of Theorem 3.3 is similar but with more complicated computations and relies on using the linear representation of  $\phi$  in  $\Gamma_h^I$  (3), so that the expectation over  $\pi$  is inside the square root by taking expectation over the linear representation at the beginning. The lower bound proof uses a simple modification of Zanette et al. (2021) which consists of the reduction from learning to testing with Assouad’s method, and the use of standard information inequalities (e.g. from total variation to KL divergence). For completeness, we provide the full proof in Appendix E.

## 5 DISCUSSION AND CONCLUSION

This work studies offline RL with linear MDP representation and contributes *Variance Aware Pessimistic Value Iteration* (VAPVI) which adopts the conditional variance information of the value function. VAPVI uses the estimated variances to reweight the Bellman residuals in the least-square pessimistic value iteration and provides improved offline learning bounds over the existing best-known results. VAPVI-I further improves over VAPVI in the state-action dimension and is near-minimax optimal. One highlight of the theorems is that our learning bounds are expressed in terms of system quantities, which automatically provide natural instance-dependent characterizations that previous results are short of.

On the other hand, while VAPVI/VAPVI-I close the existing gap from previous literature (Jin et al., 2021b; Xie et al., 2021a), the optimal guarantee is in the minimax sense. Although our upper bounds possess instance-dependent characterizations, the lower bound only holds true for a class of hard instances. In this sense, whether “instance-dependent optimality” can be achieved remains elusive in the current linear MDP setting (such a discussion is recently initiated in MAB problems (Xiao et al., 2021)). We leave this as future work.

<sup>8</sup>Variance-reweighting in (6) is important, since applying *Bernstein inequality for self-normalized martingale* (Lemma G.3) without variance-reweighting cannot provide any improvement.

## REFERENCES

- Yasin Abbasi-Yadkori, Dávid Pál, and Csaba Szepesvári. Improved algorithms for linear stochastic bandits. In *Advances in Neural Information Processing Systems*, pp. 2312–2320, 2011.
- Alekh Agarwal, Sham M Kakade, Jason D Lee, and Gaurav Mahajan. On the theory of policy gradient methods: Optimality, approximation, and distribution shift. *Journal of Machine Learning Research*, 22(98):1–76, 2021.
- Sanae Amani, Christos Thrampoulidis, and Lin F Yang. Safe reinforcement learning with linear function approximation. *arXiv preprint arXiv:2106.06239*, 2021.
- Andras Antos, Remi Munos, and Csaba Szepesvari. Fitted q-iteration in continuous action-space mdps. In *Advances in Neural Information Processing Systems*, pp. 9–16, 2008a.
- András Antos, Csaba Szepesvári, and Rémi Munos. Learning near-optimal policies with bellman-residual minimization based fitted policy iteration and a single sample path. *Machine Learning*, 71(1):89–129, 2008b.
- Alex Ayoub, Zeyu Jia, Csaba Szepesvari, Mengdi Wang, and Lin Yang. Model-based reinforcement learning with value-targeted regression. In *International Conference on Machine Learning*, pp. 463–474. PMLR, 2020.
- Qi Cai, Zhuoran Yang, Chi Jin, and Zhaoran Wang. Provably efficient exploration in policy optimization. In *International Conference on Machine Learning*, pp. 1283–1294. PMLR, 2020.
- Jinglin Chen and Nan Jiang. Information-theoretic considerations in batch reinforcement learning. In *International Conference on Machine Learning*, pp. 1042–1051, 2019.
- Lili Chen, Kevin Lu, Aravind Rajeswaran, Kimin Lee, Aditya Grover, Michael Laskin, Pieter Abbeel, Aravind Srinivas, and Igor Mordatch. Decision transformer: Reinforcement learning via sequence modeling. *arXiv preprint arXiv:2106.01345*, 2021a.
- Zixiang Chen, Dongruo Zhou, and Quanquan Gu. Almost optimal algorithms for two-player markov games with linear function approximation. *arXiv preprint arXiv:2102.07404*, 2021b.
- Fan Chung and Linyuan Lu. Concentration inequalities and martingale inequalities: a survey. *Internet Mathematics*, 3(1):79–127, 2006.
- Simon Du, Akshay Krishnamurthy, Nan Jiang, Alekh Agarwal, Miroslav Dudik, and John Langford. Provably efficient rl with rich observations via latent state decoding. In *International Conference on Machine Learning*, pp. 1665–1674. PMLR, 2019.
- Simon S Du, Sham M Kakade, Jason D Lee, Shachar Lovett, Gaurav Mahajan, Wen Sun, and Ruosong Wang. Bilinear classes: A structural framework for provable generalization in rl. *International Conference on Machine Learning*, 2021.
- Yaqi Duan, Zeyu Jia, and Mengdi Wang. Minimax-optimal off-policy evaluation with linear function approximation. In *International Conference on Machine Learning*, pp. 8334–8342, 2020.
- Yaqi Duan, Chi Jin, and Zhiyuan Li. Risk bounds and rademacher complexity in batch reinforcement learning. *International Conference on Machine Learning*, 2021.
- Damien Ernst, Pierre Geurts, and Louis Wehenkel. Tree-based batch mode reinforcement learning. *Journal of Machine Learning Research*, 6:503–556, 2005.
- Scott Fujimoto, David Meger, and Doina Precup. Off-policy deep reinforcement learning without exploration. In *International Conference on Machine Learning*, pp. 2052–2062. PMLR, 2019.
- Minbo Gao, Tianle Xie, Simon S Du, and Lin F Yang. A provably efficient algorithm for linear markov decision process with low switching cost. *arXiv preprint arXiv:2101.00494*, 2021.
- Geoffrey J Gordon. *Approximate solutions to Markov decision processes*. Carnegie Mellon University, 1999.

- Jiafan He, Dongruo Zhou, and Quanquan Gu. Logarithmic regret for reinforcement learning with linear function approximation. In *International Conference on Machine Learning*, pp. 4171–4180. PMLR, 2021.
- Michael Janner, Qiyang Li, and Sergey Levine. Reinforcement learning as one big sequence modeling problem. *arXiv preprint arXiv:2106.02039*, 2021.
- Nan Jiang, Akshay Krishnamurthy, Alekh Agarwal, John Langford, and Robert E Schapire. Contextual decision processes with low bellman rank are pac-learnable. In *International Conference on Machine Learning-Volume 70*, pp. 1704–1713, 2017.
- Chi Jin, Zhuoran Yang, Zhaoran Wang, and Michael I Jordan. Provably efficient reinforcement learning with linear function approximation. In *Conference on Learning Theory*, pp. 2137–2143. PMLR, 2020.
- Chi Jin, Qinghua Liu, and Sobhan Miryoosefi. Bellman eluder dimension: New rich classes of rl problems, and sample-efficient algorithms. *arXiv preprint arXiv:2102.00815*, 2021a.
- Ying Jin, Zhuoran Yang, and Zhaoran Wang. Is pessimism provably efficient for offline rl? In *International Conference on Machine Learning*, pp. 5084–5096. PMLR, 2021b.
- Rahul Kidambi, Aravind Rajeswaran, Praneeth Netrapalli, and Thorsten Joachims. Morel: Model-based offline reinforcement learning. *Advances in Neural Information Processing Systems*, 2020.
- Akshay Krishnamurthy, Alekh Agarwal, and John Langford. Pac reinforcement learning with rich observations. *Advances in neural information processing systems*, 2016.
- Aviral Kumar, Justin Fu, George Tucker, and Sergey Levine. Stabilizing off-policy q-learning via bootstrapping error reduction. *Advances in Neural Information Processing Systems*, 2019.
- Aviral Kumar, Aurick Zhou, George Tucker, and Sergey Levine. Conservative q-learning for offline reinforcement learning. *Advances in Neural Information Processing Systems*, 2020.
- Sascha Lange, Thomas Gabel, and Martin Riedmiller. Batch reinforcement learning. In *Reinforcement learning*, pp. 45–73. Springer, 2012.
- Tor Lattimore and Csaba Szepesvári. *Bandit algorithms*. Cambridge University Press, 2020.
- Hoang Le, Cameron Voloshin, and Yisong Yue. Batch policy learning under constraints. In *International Conference on Machine Learning*, pp. 3703–3712, 2019.
- Sergey Levine, Aviral Kumar, George Tucker, and Justin Fu. Offline reinforcement learning: Tutorial, review, and perspectives on open problems. *arXiv preprint arXiv:2005.01643*, 2020.
- Yao Liu, Adith Swaminathan, Alekh Agarwal, and Emma Brunskill. Provably good batch reinforcement learning without great exploration. *arXiv preprint arXiv:2007.08202*, 2020.
- Zhihan Liu, Yufeng Zhang, Zuyue Fu, Zhuoran Yang, and Zhaoran Wang. Provably efficient generative adversarial imitation learning for online and offline setting with linear function approximation. *arXiv preprint arXiv:2108.08765*, 2021.
- Yifei Min, Tianhao Wang, Dongruo Zhou, and Quanquan Gu. Variance-aware off-policy evaluation with linear function approximation. *Advances in neural information processing systems*, 2021.
- Volodymyr Mnih, Koray Kavukcuoglu, David Silver, Andrei A Rusu, Joel Veness, Marc G Bellemare, Alex Graves, Martin Riedmiller, Andreas K Fidjeland, Georg Ostrovski, et al. Human-level control through deep reinforcement learning. *nature*, 518(7540):529–533, 2015.
- Aditya Modi, Nan Jiang, Ambuj Tewari, and Satinder Singh. Sample complexity of reinforcement learning using linearly combined model ensembles. In *International Conference on Artificial Intelligence and Statistics*, pp. 2010–2020. PMLR, 2020.
- Rémi Munos. Error bounds for approximate policy iteration. In *ICML*, volume 3, pp. 560–567, 2003.

- Thanh Nguyen-Tang, Sunil Gupta, Hung Tran-The, and Svetha Venkatesh. On finite-sample analysis of offline reinforcement learning with deep relu networks. *arXiv preprint arXiv:2103.06671*, 2021.
- Paria Rashidinejad, Banghua Zhu, Cong Ma, Jiantao Jiao, and Stuart Russell. Bridging offline reinforcement learning and imitation learning: A tale of pessimism. *arXiv preprint arXiv:2103.12021*, 2021.
- Tongzheng Ren, Jialian Li, Bo Dai, Simon S Du, and Sujay Sanghavi. Nearly horizon-free offline reinforcement learning. *Advances in neural information processing systems*, 2021.
- Paul D Sampson and Peter Guttorp. Nonparametric estimation of nonstationary spatial covariance structure. *Journal of the American Statistical Association*, 87(417):108–119, 1992.
- David Silver, Julian Schrittwieser, Karen Simonyan, Ioannis Antonoglou, Aja Huang, Arthur Guez, Thomas Hubert, Lucas Baker, Matthew Lai, Adrian Bolton, et al. Mastering the game of go without human knowledge. *nature*, 550(7676):354–359, 2017.
- Wen Sun, Nan Jiang, Akshay Krishnamurthy, Alekh Agarwal, and John Langford. Model-based rl in contextual decision processes: Pac bounds and exponential improvements over model-free approaches. In *Conference on learning theory*, pp. 2898–2933. PMLR, 2019.
- Richard S Sutton and Andrew G Barto. *Reinforcement learning: An introduction*. MIT press, 2018.
- Csaba Szepesvári and Rémi Munos. Finite time bounds for sampling based fitted value iteration. In *Proceedings of the 22nd international conference on Machine learning*, pp. 880–887, 2005.
- Mohammad Sadegh Talebi and Odalric-Ambrym Maillard. Variance-aware regret bounds for undiscounted reinforcement learning in mdps. In *Algorithmic Learning Theory*, pp. 770–805. PMLR, 2018.
- Joel A Tropp. User-friendly tail bounds for sums of random matrices. *Foundations of computational mathematics*, 12(4):389–434, 2012.
- Masatoshi Uehara and Wen Sun. Pessimistic model-based offline rl: Pac bounds and posterior sampling under partial coverage. *arXiv preprint arXiv:2107.06226*, 2021.
- Ruosong Wang, Simon S Du, Lin F Yang, and Ruslan Salakhutdinov. On reward-free reinforcement learning with linear function approximation. *Advances in neural information processing systems*, 2020.
- Ruosong Wang, Dean P Foster, and Sham M Kakade. What are the statistical limits of offline rl with linear function approximation? *International Conference on Learning Representations*, 2021a.
- Yining Wang, Ruosong Wang, Simon Shaolei Du, and Akshay Krishnamurthy. Optimism in reinforcement learning with generalized linear function approximation. In *International Conference on Learning Representations*, 2021b.
- Yifan Wu, George Tucker, and Ofir Nachum. Behavior regularized offline reinforcement learning. *arXiv preprint arXiv:1911.11361*, 2019.
- Chenjun Xiao, Yifan Wu, Jincheng Mei, Bo Dai, Tor Lattimore, Lihong Li, Csaba Szepesvari, and Dale Schuurmans. On the optimality of batch policy optimization algorithms. In *International Conference on Machine Learning*, pp. 11362–11371. PMLR, 2021.
- Tengyang Xie and Nan Jiang.  $Q^*$  approximation schemes for batch reinforcement learning: A theoretical comparison. In *Uncertainty in Artificial Intelligence*, pp. 550–559, 2020.
- Tengyang Xie, Ching-An Cheng, Nan Jiang, Paul Mineiro, and Alekh Agarwal. Bellman-consistent pessimism for offline reinforcement learning. *Advances in neural information processing systems*, 2021a.
- Tengyang Xie, Nan Jiang, Huan Wang, Caiming Xiong, and Yu Bai. Policy finetuning: Bridging sample-efficient offline and online reinforcement learning. *Advances in neural information processing systems*, 2021b.

- Lin Yang and Mengdi Wang. Sample-optimal parametric q-learning using linearly additive features. In *International Conference on Machine Learning*, pp. 6995–7004. PMLR, 2019.
- Lin Yang and Mengdi Wang. Reinforcement learning in feature space: Matrix bandit, kernels, and regret bound. In *International Conference on Machine Learning*, pp. 10746–10756. PMLR, 2020.
- Ming Yin and Yu-Xiang Wang. Asymptotically efficient off-policy evaluation for tabular reinforcement learning. In *International Conference on Artificial Intelligence and Statistics*, pp. 3948–3958. PMLR, 2020.
- Ming Yin and Yu-Xiang Wang. Optimal uniform ope and model-based offline reinforcement learning in time-homogeneous, reward-free and task-agnostic settings. *Advances in neural information processing systems*, 2021a.
- Ming Yin and Yu-Xiang Wang. Towards instance-optimal offline reinforcement learning with pessimism. *Advances in neural information processing systems*, 2021b.
- Ming Yin, Yu Bai, and Yu-Xiang Wang. Near-optimal provable uniform convergence in offline policy evaluation for reinforcement learning. In *International Conference on Artificial Intelligence and Statistics*, pp. 1567–1575. PMLR, 2021.
- Tianhe Yu, Garrett Thomas, Lantao Yu, Stefano Ermon, James Zou, Sergey Levine, Chelsea Finn, and Tengyu Ma. Mopo: Model-based offline policy optimization. *arXiv preprint arXiv:2005.13239*, 2020.
- Andrea Zanette. Exponential lower bounds for batch reinforcement learning: Batch rl can be exponentially harder than online rl. *International Conference on Machine Learning*, 2021.
- Andrea Zanette and Emma Brunskill. Tighter problem-dependent regret bounds in reinforcement learning without domain knowledge using value function bounds. In *International Conference on Machine Learning*, pp. 7304–7312. PMLR, 2019.
- Andrea Zanette, Alessandro Lazaric, Mykel Kochenderfer, and Emma Brunskill. Learning near optimal policies with low inherent bellman error. In *International Conference on Machine Learning*, pp. 10978–10989. PMLR, 2020.
- Andrea Zanette, Martin J. Wainwright, and Emma Brunskill. Provable benefits of actor-critic methods for offline reinforcement learning, 2021.
- Zihan Zhang, Jiaqi Yang, Xiangyang Ji, and Simon S Du. Variance-aware confidence set: Variance-dependent bound for linear bandits and horizon-free bound for linear mixture mdp. *arXiv preprint arXiv:2101.12745*, 2021.
- Dongruo Zhou, Quanquan Gu, and Csaba Szepesvari. Nearly minimax optimal reinforcement learning for linear mixture markov decision processes. In *Conference on Learning Theory*, pp. 4532–4576. PMLR, 2021.

# Ethics Statement

This draft does not have any ethics influence since it's a theoretical paper that studies offline RL with linear representation.

## Appendix

### A NOTATION LIST

|                                 |                                                                                                                              |
|---------------------------------|------------------------------------------------------------------------------------------------------------------------------|
| $\Sigma_h^p$                    | $\mathbb{E}_{\mu,h} [\phi(s,a)\phi(s,a)^\top]$                                                                               |
| $\Lambda_h^p$                   | $\mathbb{E}_{\mu,h} [\sigma_{V_{h+1}}(s,a)^{-2}\phi(s,a)\phi(s,a)^\top]$                                                     |
| $\kappa$                        | $\min_h \lambda_{\min}(\Sigma_h^p)$                                                                                          |
| $\iota$                         | $\min_h \lambda_{\min}(\Lambda_h^p) \geq \kappa/H^2$ for any $V_h$                                                           |
| $\sigma_V^2(s,a)$               | $\max\{1, \text{Var}_{P_h}(V)(s,a)\}$ for any $V$                                                                            |
| $\sigma_{V_{h+1}}^2(s,a)$       | $\max\{1, \text{Var}_{P_h}(V_{h+1})(s,a)\}$                                                                                  |
| $\widehat{\sigma}_{V_h}^2(s,a)$ | $\max\{1, \widehat{\text{Var}}_h V_{h+1}(s,a)\}$                                                                             |
| $\bar{\Sigma}_h$                | $\sum_{\tau=1}^K \phi(\bar{s}_h^\tau, \bar{a}_h^\tau)\phi(\bar{s}_h^\tau, \bar{a}_h^\tau)^\top + \lambda I_d$                |
| $\hat{\Lambda}_h$               | $\sum_{k=1}^K \phi(s_h^k, a_h^k)\phi(s_h^k, a_h^k)^\top / \widehat{\sigma}_h^2(s_h^k, a_h^k) + \lambda I_d$                  |
| $\mathcal{M}_1$                 | $\max\{2\lambda, 128 \log(2d/\delta), 128H^4 \log(2d/\delta)/\kappa^2\}$                                                     |
| $\mathcal{M}_2$                 | $\max\{\frac{\lambda^2}{\kappa \log((\lambda+K)H/\lambda\delta)}, 96^2 H^{12} d \log((\lambda+K)H/\lambda\delta)/\kappa^5\}$ |
| $\mathcal{M}_3$                 | $\max\{512H^4/\kappa^2 \log(\frac{2d}{\delta}), 4\lambda H^2/\kappa\}$                                                       |
| $\mathcal{M}_4$                 | $12\sqrt{H^4 d \log((\lambda+K)H/\lambda\delta)/\kappa}$                                                                     |
| $\delta$                        | Failure probability                                                                                                          |
| $\xi$                           | $\sup_{V \in [0,H], s' \sim P_h(s,a), h \in [H]} \left  \frac{r_h + V(s') - (\mathcal{T}_h V)(s,a)}{\sigma_V(s,a)} \right $  |

### B EXTENDED LITERATURE REVIEW

#### B.1 LINEAR MODEL REPRESENTATION AND ITS EXTENSION IN ONLINE RL

There are numerous works in online RL that study linear model representations. [Yang & Wang \(2019; 2020\)](#); [Jin et al. \(2020\)](#) propose Linear MDP, which assumes the transition kernel and the reward are linear in given features. [Cai et al. \(2020\)](#); [Ayoub et al. \(2020\)](#) propose Linear mixture MDP, which assumes the transition probability is a linear combination of some base kernels. Linear Bellman Complete model ([Zanette et al., 2020](#)) generalizes linear MDP model by allowing linear functions to approximate the  $Q$ -function and the function class is closed under the Bellman update. The notion of low Bellman rank ([Jiang et al., 2017](#)) subsumes not only linear MDPs but also models including linear quadratic regulator (LQR), Reactive POMDP ([Krishnamurthy et al., 2016](#)) and Block MDP ([Du et al., 2019](#)). There are also other models, *e.g.* factored MDP ([Sun et al., 2019](#)), Bellman Eluder dimension ([Jin et al., 2021a](#)) and Bilinear class ([Du et al., 2021](#)). With the linear MDP model itself, there are also fruitful extensions, *e.g.* gap-dependent analysis with logarithmic regret ([He et al., 2021](#)), low-switching cost RL ([Gao et al., 2021](#)), safe RL ([Amani et al., 2021](#)), reward-free RL ([Wang et al., 2020](#)), generalized linear model (GLM) ([Wang et al., 2021b](#)), two-player markov game ([Chen et al., 2021b](#)) and generative adversarial learning ([Liu et al., 2021](#)). In particular, [Zhou et al. \(2021\)](#) shows UCRL-VTR+ is near-minimax optimal when feature dimension  $d \geq H$ .

#### B.2 EXISTING RESULTS IN OFFLINE RL WITH MODEL REPRESENTATIONS

**Offline RL with general function representations.** The finite sample analysis of offline RL with function approximation is initially conducted by Fitted  $Q$ -Iteration (FQI) type algorithms and can

be dated back to (Munos, 2003; Szepesvári & Munos, 2005; Antos et al., 2008a;b). Later, Chen & Jiang (2019); Le et al. (2019); Xie & Jiang (2020) follow this line of research and derive the improved learning results. However, owing to the aim for tackling general function approximation, those learning bounds are expressed in terms of the stringent *concentrability coefficients* (therefore, are less adaptive to individual instances) and are usually only *information-theoretical*, due to the computational intractability of the optimization procedure over the general function classes. Other works impose weaker assumptions (e.g. partial coverage (Liu et al., 2020; Kidambi et al., 2020; Uehara & Sun, 2021)), and their finite sample analysis are generally suboptimal in terms of  $H$  or the effective horizon  $(1 - \gamma)^{-1}$ .

**Offline RL with tabular models.** For tabular MDPs, tight learning bounds can be achieved under several data-coverage assumptions. For the class of problems with uniform data-visitation measure  $d_m$ , the near-optimal sample complexity bound has the rate  $O(H^3/d_m\epsilon^2)$  for time-inhomogeneous MDPs (Yin et al., 2021) and  $O(H^2/d_m\epsilon)$  for time-homogeneous MDPs (Yin & Wang, 2021a; Ren et al., 2021). Under the single concentrability assumption, the tight rate  $O(H^3SC^*/\epsilon^2)$  is obtained by Xie et al. (2021b). In particular, the recent study Yin & Wang (2021b) introduces the *intrinsic offline learning bound* that is not only instance-dependent but also subsumes previous optimal results.

**Offline RL with linear model representations.** Recently, there are more focus on studying the provable efficient offline RL under the linear model representations. Jin et al. (2021b) first shows offline RL with linear MDP is provably efficient by the *pessimistic value iteration* (PEVI), which is an offline counterpart of LSVI-UCB in Jin et al. (2020). Their analysis deviates from their lower bound by a factor of  $d \cdot H$  (check their Theorem 4.4 and 4.6). Later, Xie et al. (2021a) considers function approximation under the Bellman-consistent assumptions, and, when realized to linear MDP setting, improve the sample complexity guarantee of Jin et al. (2021b) by a order  $O(d)$  (Theorem 3.2).<sup>9</sup> However, their improvement only holds for finite action space (due to the dependence  $\log |A|$ ) and by the direct reduction (from Theorem 3.1) their result does not imply a computationally tractable algorithm. In addition, there is no improvement on the horizon dependence. Concurrently, Zanette et al. (2021) considers the Linear Bellman Complete model (which originates from its online version Zanette et al. (2020)) and designs the *actor-critic* style algorithm that achieves tight result under the assumption that the value function is bounded by 1. While their algorithm is efficient (which is based on solving a sequence of second-order cone programs), the resulting learning bound requires the action space to be finite due to the mirror descent/natural policy gradient updates in the *Actor* procedure (Agarwal et al., 2021). Besides, assuming the value function to be less than 1 simplifies the challenges in dealing with horizon  $H$  since when rescale their result to  $[0, H]$ , there is a  $H$  factor blow-up, which makes no improvement in the horizon dependence comparing to Jin et al. (2021b). On the other hand, Wang et al. (2021a); Zanette (2021) study the statistical hardness of offline RL with linear representations by proofing the exponential lower bounds. As a result, none of the existing algorithms can achieve the statistical limit for the well-structured linear MDP model with the general (infinite or continuous) state-action spaces in the offline regime.

## C PROOFS IN SECTION 3.2

Instead of proofing the result for  $v^* - v^{\hat{\pi}}$ , in most parts of the proof we deal with  $V_1^* - V_1^{\hat{\pi}}$ , which is more general.

### C.1 SOME PREPARATIONS

Define the Bellman update error  $\zeta_h(s, a) := (\mathcal{T}_h \hat{V}_{h+1})(s, a) - \hat{Q}_h(s, a)$  and recall  $\hat{\pi}_h(s) = \arg \max_{\pi_h} \langle \hat{Q}_h(s, \cdot), \pi_h(\cdot | s) \rangle_A$ , then by the direct application of Lemma G.8

$$V_1^{\pi}(s) - V_1^{\hat{\pi}}(s) \leq \sum_{h=1}^H \mathbb{E}_{\pi} [\zeta_h(s_h, a_h) | s_1 = s] - \sum_{h=1}^H \mathbb{E}_{\hat{\pi}} [\zeta_h(s_h, a_h) | s_1 = s]. \quad (7)$$

The next lemma shows it is sufficient to bound the pessimistic penalty, which is the key in the proof.

**Lemma C.1.** *Suppose with probability  $1 - \delta$ , it holds for all  $h, s, a \in [H] \times \mathcal{S} \times \mathcal{A}$  that  $|(\mathcal{T}_h \hat{V}_{h+1} - \hat{\mathcal{T}}_h \hat{V}_{h+1})(s, a)| \leq \Gamma_h(s, a)$ , then it implies  $\forall s, a, h \in \mathcal{S} \times \mathcal{A} \times [H]$ ,  $0 \leq \zeta_h(s, a) \leq 2\Gamma_h(s, a)$ .*

<sup>9</sup>This comparison is based on translating their infinite horizon discounted setting to the finite horizon case.

Furthermore, it holds for any policy  $\pi$  simultaneously, with probability  $1 - \delta$ ,

$$V_1^\pi(s) - V_1^{\hat{\pi}}(s) \leq \sum_{h=1}^H 2 \cdot \mathbb{E}_\pi [\Gamma_h(s_h, a_h) \mid s_1 = s].$$

*Proof of Lemma C.1.* We first show given  $|(\mathcal{T}_h \hat{V}_{h+1} - \hat{\mathcal{T}}_h \hat{V}_{h+1})(s, a)| \leq \Gamma_h(s, a)$ , then  $0 \leq \zeta_h(s, a) \leq 2\Gamma_h(s, a)$ ,  $\forall s, a, h \in \mathcal{S} \times \mathcal{A} \times [H]$ .

**Step1:** we first show  $0 \leq \zeta_h(s, a)$ ,  $\forall s, a, h \in \mathcal{S} \times \mathcal{A} \times [H]$ .

Indeed, if  $\bar{Q}_h(s, a) \leq 0$ , then by definition  $\hat{Q}_h(s, a) = 0$  and in this case  $\zeta_h(s, a) := (\mathcal{T}_h \hat{V}_{h+1})(s, a) - \hat{Q}_h(s, a) = (\mathcal{T}_h \hat{V}_{h+1})(s, a) \geq 0$ ; if  $\bar{Q}_h(s, a) > 0$ , then  $\hat{Q}_h(s, a) \leq \bar{Q}_h(s, a)$  and

$$\begin{aligned} \zeta_h(s, a) &:= (\mathcal{T}_h \hat{V}_{h+1})(s, a) - \hat{Q}_h(s, a) \geq (\mathcal{T}_h \hat{V}_{h+1})(s, a) - \bar{Q}_h(s, a) \\ &= (\mathcal{T}_h \hat{V}_{h+1})(s, a) - (\hat{\mathcal{T}}_h \hat{V}_{h+1})(s, a) + \Gamma_h(s, a) \geq 0. \end{aligned}$$

**Step2:** next we show  $\zeta_h(s, a) \leq 2\Gamma_h(s, a)$ ,  $\forall s, a, h \in \mathcal{S} \times \mathcal{A} \times [H]$ .

Indeed, we have  $\hat{Q}_h(s, a) = \max(\bar{Q}_h(s, a), 0)$  and this is because:  $\bar{Q}_h(x, a) = (\hat{\mathcal{T}}_h \hat{V}_{h+1})(x, a) - \Gamma_h(x, a) \leq (\mathcal{T}_h \hat{V}_{h+1})(x, a) \leq H - h + 1$ . Therefore, in this case we have:

$$\begin{aligned} \zeta_h(s, a) &:= (\mathcal{T}_h \hat{V}_{h+1})(s, a) - \hat{Q}_h(s, a) \leq (\mathcal{T}_h \hat{V}_{h+1})(s, a) - \bar{Q}_h(s, a) \\ &= (\mathcal{T}_h \hat{V}_{h+1})(s, a) - (\hat{\mathcal{T}}_h \hat{V}_{h+1})(s, a) + \Gamma_h(s, a) \geq 2 \cdot \Gamma_h(s, a). \end{aligned}$$

For the last statement, denote  $\mathfrak{F} := \{0 \leq \zeta_h(s, a) \leq 2\Gamma_h(s, a), \forall s, a, h \in \mathcal{S} \times \mathcal{A} \times [H]\}$ . Note conditional on  $\mathfrak{F}$ , then by equation 7,  $V_1^\pi(s) - V_1^{\hat{\pi}}(s) \leq \sum_{h=1}^H 2 \cdot \mathbb{E}_\pi [\Gamma_h(s_h, a_h) \mid s_1 = s]$  holds for any policy  $\pi$  almost surely. Therefore,

$$\begin{aligned} &\mathbb{P} \left[ \forall \pi, V_1^\pi(s) - V_1^{\hat{\pi}}(s) \leq \sum_{h=1}^H 2 \cdot \mathbb{E}_\pi [\Gamma_h(s_h, a_h) \mid s_1 = s] \right] \\ &= \mathbb{P} \left[ \forall \pi, V_1^\pi(s) - V_1^{\hat{\pi}}(s) \leq \sum_{h=1}^H 2 \cdot \mathbb{E}_\pi [\Gamma_h(s_h, a_h) \mid s_1 = s] \mid \mathfrak{F} \right] \cdot \mathbb{P}[\mathfrak{F}] \\ &\quad + \mathbb{P} \left[ \forall \pi, V_1^\pi(s) - V_1^{\hat{\pi}}(s) \leq \sum_{h=1}^H 2 \cdot \mathbb{E}_\pi [\Gamma_h(s_h, a_h) \mid s_1 = s] \mid \mathfrak{F}^c \right] \cdot \mathbb{P}[\mathfrak{F}^c] \\ &\geq \mathbb{P} \left[ \forall \pi, V_1^\pi(s) - V_1^{\hat{\pi}}(s) \leq \sum_{h=1}^H 2 \cdot \mathbb{E}_\pi [\Gamma_h(s_h, a_h) \mid s_1 = s] \mid \mathfrak{F} \right] \cdot \mathbb{P}[\mathfrak{F}] \geq 1 \cdot \mathbb{P}[\mathfrak{F}] \geq 1 - \delta, \end{aligned}$$

which finishes the proof.  $\square$

## C.2 BOUNDING $|(\mathcal{T}_h \hat{V}_{h+1})(s, a) - (\hat{\mathcal{T}}_h \hat{V}_{h+1})(s, a)|$ .

By Lemma C.1, it remains to bound  $|(\mathcal{T}_h \hat{V}_{h+1})(s, a) - (\hat{\mathcal{T}}_h \hat{V}_{h+1})(s, a)|$ . Suppose  $w_h$  is the coefficient corresponding to the  $\mathcal{T}_h \hat{V}_{h+1}$  (such  $w_h$  exists by Lemma G.9), i.e.  $\mathcal{T}_h \hat{V}_{h+1} = \phi^\top w_h$ , and recall

$(\widehat{\mathcal{T}}_h \widehat{V}_{h+1})(s, a) = \phi(s, a)^\top \widehat{w}_h$ , then:

$$\begin{aligned}
& \left( \widehat{\mathcal{T}}_h \widehat{V}_{h+1} \right) (s, a) - \left( \widehat{\mathcal{T}}_h \widehat{V}_{h+1} \right) (s, a) = \phi(s, a)^\top (w_h - \widehat{w}_h) \\
& = \phi(s, a)^\top w_h - \phi(s, a)^\top \widehat{\Lambda}_h^{-1} \left( \sum_{\tau=1}^K \phi(s_h^\tau, a_h^\tau) \cdot \left( r_h^\tau + \widehat{V}_{h+1}(s_{h+1}^\tau) \right) / \widehat{\sigma}_h^2(s_h^\tau, a_h^\tau) \right) \\
& = \underbrace{\phi(s, a)^\top w_h - \phi(s, a)^\top \widehat{\Lambda}_h^{-1} \left( \sum_{\tau=1}^K \phi(s_h^\tau, a_h^\tau) \cdot \left( \mathcal{T}_h \widehat{V}_{h+1} \right) (s_h^\tau, a_h^\tau) / \widehat{\sigma}_h^2(s_h^\tau, a_h^\tau) \right)}_{(i)} \\
& \quad + \underbrace{\phi(s, a)^\top \widehat{\Lambda}_h^{-1} \left( \sum_{\tau=1}^K \phi(s_h^\tau, a_h^\tau) \cdot \left( r_h^\tau + \widehat{V}_{h+1}(s_{h+1}^\tau) - \left( \mathcal{T}_h \widehat{V}_{h+1} \right) (s_h^\tau, a_h^\tau) \right) / \widehat{\sigma}_h^2(s_h^\tau, a_h^\tau) \right)}_{(ii)}.
\end{aligned} \tag{8}$$

The term (i) is dealt by the following lemma.

**Lemma C.2.** Recall  $\kappa$  in Assumption 2.2. Suppose  $K \geq \max \{512H^4/\kappa^2 \log(\frac{2d}{\delta}), 4\lambda H^2/\kappa\}$ , then with probability  $1 - \delta$ , for all  $s, a, h \in \mathcal{S} \times \mathcal{A} \times [H]$

$$\left| \phi(s, a)^\top w_h - \phi(s, a)^\top \widehat{\Lambda}_h^{-1} \left( \sum_{\tau=1}^K \phi(s_h^\tau, a_h^\tau) \cdot \left( \mathcal{T}_h \widehat{V}_{h+1} \right) (s_h^\tau, a_h^\tau) / \widehat{\sigma}_h^2(s_h^\tau, a_h^\tau) \right) \right| \leq \frac{2\lambda H^3 \sqrt{d}/\kappa}{K}.$$

*Proof.* Recall  $\mathcal{T}_h \widehat{V}_{h+1} = \phi^\top w_h$  and apply Lemma G.6, we obtain with probability  $1 - \delta$ , for all  $s, a, h \in \mathcal{S} \times \mathcal{A} \times [H]$ ,

$$\begin{aligned}
& \phi(s, a)^\top w_h - \phi(s, a)^\top \widehat{\Lambda}_h^{-1} \left( \sum_{\tau=1}^K \phi(s_h^\tau, a_h^\tau) \cdot \left( \mathcal{T}_h \widehat{V}_{h+1} \right) (s_h^\tau, a_h^\tau) / \widehat{\sigma}_h^2(s_h^\tau, a_h^\tau) \right) \\
& = \phi(s, a)^\top w_h - \phi(s, a)^\top \widehat{\Lambda}_h^{-1} \left( \sum_{\tau=1}^K \phi(s_h^\tau, a_h^\tau) \cdot \phi(s_h^\tau, a_h^\tau)^\top w_h / \widehat{\sigma}_h^2(s_h^\tau, a_h^\tau) \right) \\
& = \phi(s, a)^\top w_h - \phi(s, a)^\top \widehat{\Lambda}_h^{-1} \left( \widehat{\Lambda}_h - \lambda I \right) w_h = \lambda \cdot \phi(s, a)^\top \widehat{\Lambda}_h^{-1} w_h \\
& \leq \lambda \|\phi(s, a)\|_{\widehat{\Lambda}_h^{-1}} \cdot \|w_h\|_{\widehat{\Lambda}_h^{-1}} \leq \frac{\lambda}{K} \|\phi(s, a)\|_{(\tilde{\Lambda}_h^p)^{-1}} \cdot \|w_h\|_{(\tilde{\Lambda}_h^p)^{-1}} \\
& \leq \frac{\lambda}{K} 1 \cdot \sqrt{\|(\tilde{\Lambda}_h^p)^{-1}\|} \cdot 2H\sqrt{d} \cdot \sqrt{\|(\tilde{\Lambda}_h^p)^{-1}\|}
\end{aligned}$$

where  $\tilde{\Lambda}_h^p := \mathbb{E}_{\mu, h} [\widehat{\sigma}_h(s, a)^{-2} \phi(s, a) \phi(s, a)^\top]$  and the second inequality is by Lemma G.6 (with  $\phi' = \phi/\widehat{\sigma}_h$  and  $\|\phi/\widehat{\sigma}_h\| \leq \|\phi\| \leq 1 := C$ ) and the third inequality uses  $\sqrt{a^\top \cdot A \cdot a} \leq \sqrt{\|a\|_2 \|A\|_2 \|a\|_2} = \|a\|_2 \sqrt{\|A\|_2}$  with  $a$  to be either  $\phi$  or  $w_h$ . Moreover,  $\lambda_{\min}(\tilde{\Lambda}_h^p) \geq \kappa / \max_{h, s, a} \widehat{\sigma}_h(s, a)^2 \geq \kappa / H^2$  implies  $\|(\tilde{\Lambda}_h^p)^{-1}\| \leq H^2/\kappa$ , therefore for all  $s, a, h \in \mathcal{S} \times \mathcal{A} \times [H]$ , with probability  $1 - \delta$

$$\left| \phi(s, a)^\top w_h - \phi(s, a)^\top \widehat{\Lambda}_h^{-1} \left( \sum_{\tau=1}^K \phi(s_h^\tau, a_h^\tau) \cdot \left( \mathcal{T}_h \widehat{V}_{h+1} \right) (s_h^\tau, a_h^\tau) / \widehat{\sigma}_h^2(s_h^\tau, a_h^\tau) \right) \right| \leq \frac{2\lambda H^3 \sqrt{d}/\kappa}{K}.$$

□

For term (ii), denote:  $x_\tau = \frac{\phi(s_h^\tau, a_h^\tau)}{\widehat{\sigma}(s_h^\tau, a_h^\tau)}$ ,  $\eta_\tau = \left(r_h^\tau + \widehat{V}_{h+1}(s_{h+1}^\tau) - (\mathcal{T}_h \widehat{V}_{h+1})(s_h^\tau, a_h^\tau)\right) / \widehat{\sigma}(s_h^\tau, a_h^\tau)$ , then by Cauchy inequality it follows

$$\begin{aligned} & \left| \phi(s, a)^\top \widehat{\Lambda}_h^{-1} \left( \sum_{\tau=1}^K \phi(s_h^\tau, a_h^\tau) \cdot \left( r_h^\tau + \widehat{V}_{h+1}(s_{h+1}^\tau) - (\mathcal{T}_h \widehat{V}_{h+1})(s_h^\tau, a_h^\tau) \right) / \widehat{\sigma}_h^2(s_h^\tau, a_h^\tau) \right) \right| \\ & \leq \sqrt{\phi(s, a)^\top \widehat{\Lambda}_h^{-1} \phi(s, a)} \cdot \left\| \sum_{\tau=1}^K x_\tau \eta_\tau \right\|_{\widehat{\Lambda}_h^{-1}} \end{aligned} \quad (9)$$

### C.2.1 ANALYZING THE TERM $\sqrt{\phi(s, a) \widehat{\Lambda}_h^{-1} \phi(s, a)}$

Recall (in Theorem 3.2) the estimated  $\widehat{\Lambda}_h = \sum_{\tau=1}^K \phi(s_h^\tau, a_h^\tau) \phi(s_h^\tau, a_h^\tau)^\top / \widehat{\sigma}^2(s_h^\tau, a_h^\tau) + \lambda \cdot I$  and  $\Lambda_h = \sum_{\tau=1}^K \phi(s_h^\tau, a_h^\tau) \phi(s_h^\tau, a_h^\tau)^\top / \sigma_{\widehat{V}_{h+1}}^2(s_h^\tau, a_h^\tau) + \lambda I$ . Then we have the following lemma to control the term  $\sqrt{\phi(s, a) \widehat{\Lambda}_h^{-1} \phi(s, a)}$ .

**Lemma C.3.** Denote the quantities  $C_1 = \max\{2\lambda, 128 \log(2d/\delta), 128H^4 \log(2d/\delta)/\kappa^2\}$  and  $C_2 = \max\{\frac{\lambda^2}{\kappa \log((\lambda+K)H/\lambda\delta)}, 96^2 H^{12} d \log((\lambda+K)H/\lambda\delta)/\kappa^5\}$ . Suppose the number of episode  $K$  satisfies  $K > \max\{C_1, C_2\}$ , then with probability  $1 - \delta$ ,

$$\sqrt{\phi(s, a) \widehat{\Lambda}_h^{-1} \phi(s, a)} \leq 2 \sqrt{\phi(s, a) \Lambda_h^{-1} \phi(s, a)}, \quad \forall s, a \in \mathcal{S} \times \mathcal{A}.$$

*Proof of Lemma C.3.* By definition  $\sqrt{\phi(s, a) \widehat{\Lambda}_h^{-1} \phi(s, a)} = \|\phi(s, a)\|_{\widehat{\Lambda}_h^{-1}}$ . Then denote

$$\widehat{\Lambda}'_h = \frac{1}{K} \widehat{\Lambda}_h, \quad \Lambda'_h = \frac{1}{K} \Lambda_h,$$

where  $\Lambda_h = \sum_{\tau=1}^K \phi(s_h^\tau, a_h^\tau) \phi(s_h^\tau, a_h^\tau)^\top / \sigma_{\widehat{V}_{h+1}}^2(s_h^\tau, a_h^\tau) + \lambda I$ . Under the condition of  $K$ , by Lemma C.7, with probability  $1 - \delta$

$$\begin{aligned} & \left\| \widehat{\Lambda}'_h - \Lambda'_h \right\| \leq \sup_{s, a} \left\| \frac{\phi(s, a) \phi(s, a)^\top}{\widehat{\sigma}_h^2(s, a)} - \frac{\phi(s, a) \phi(s, a)^\top}{\sigma_{\widehat{V}_{h+1}}^2(s, a)} \right\| \\ & \leq \sup_{s, a} \left| \frac{\widehat{\sigma}_h^2(s, a) - \sigma_{\widehat{V}_{h+1}}^2(s, a)}{\widehat{\sigma}_h^2(s, a) \sigma_{\widehat{V}_{h+1}}^2(s, a)} \right| \cdot \|\phi(s, a)\|^2 \leq \sup_{s, a} \left| \frac{\widehat{\sigma}_h^2(s, a) - \sigma_{\widehat{V}_{h+1}}^2(s, a)}{1} \right| \cdot 1 \quad (10) \\ & \leq 12 \sqrt{\frac{H^4 d}{\kappa K} \log\left(\frac{(\lambda+K)H}{\lambda\delta}\right)} + 12\lambda \frac{H^2 \sqrt{d}}{\kappa K}. \end{aligned}$$

Next by Lemma G.5 (with  $\phi$  to be  $\phi/\sigma_{\widehat{V}_{h+1}}$  and  $C = 1$ ), it holds with probability  $1 - \delta$ ,

$$\left\| \Lambda'_h - \left( \mathbb{E}_{\mu, h}[\phi(s, a) \phi(s, a)^\top / \sigma_{\widehat{V}_{h+1}}^2(s, a)] + \frac{\lambda}{K} I_d \right) \right\| \leq \frac{4\sqrt{2}}{\sqrt{K}} \left( \log \frac{2d}{\delta} \right)^{1/2}.$$

Therefore by Weyl's spectrum theorem and the condition  $K > \max\{2\lambda, 128 \log(2d/\delta), 128H^4 \log(2d/\delta)/\kappa^2\}$ , the above implies

$$\begin{aligned}
\|\Lambda'_h\| &= \lambda_{\max}(\Lambda'_h) \leq \lambda_{\max}\left(\mathbb{E}_{\mu,h}[\phi(s,a)\phi(s,a)^\top / \sigma_{\hat{V}_{h+1}}^2(s,a)]\right) + \frac{\lambda}{K} + \frac{4\sqrt{2}}{\sqrt{K}} \left(\log \frac{2d}{\delta}\right)^{1/2} \\
&= \left\|\mathbb{E}_{\mu,h}[\phi(s,a)\phi(s,a)^\top / \sigma_{\hat{V}_{h+1}}^2(s,a)]\right\|_2 + \frac{\lambda}{K} + \frac{4\sqrt{2}}{\sqrt{K}} \left(\log \frac{2d}{\delta}\right)^{1/2} \\
&\leq \|\phi(s,a)\|^2 + \frac{\lambda}{K} + \frac{4\sqrt{2}}{\sqrt{K}} \left(\log \frac{2d}{\delta}\right)^{1/2} \leq 1 + \frac{\lambda}{K} + \frac{4\sqrt{2}}{\sqrt{K}} \left(\log \frac{2d}{\delta}\right)^{1/2} \leq 2, \\
\lambda_{\min}(\Lambda'_h) &\geq \lambda_{\min}\left(\mathbb{E}_{\mu,h}[\phi(s,a)\phi(s,a)^\top / \sigma_{\hat{V}_{h+1}}^2(s,a)]\right) + \frac{\lambda}{K} - \frac{4\sqrt{2}}{\sqrt{K}} \left(\log \frac{2d}{\delta}\right)^{1/2} \\
&\geq \lambda_{\min}\left(\mathbb{E}_{\mu,h}[\phi(s,a)\phi(s,a)^\top / \sigma_{\hat{V}_{h+1}}^2(s,a)]\right) - \frac{4\sqrt{2}}{\sqrt{K}} \left(\log \frac{2d}{\delta}\right)^{1/2} \\
&\geq \frac{\kappa}{H^2} - \frac{4\sqrt{2}}{\sqrt{K}} \left(\log \frac{2d}{\delta}\right)^{1/2} \geq \frac{\kappa}{2H^2}.
\end{aligned}$$

Hence with probability  $1 - \delta$ ,  $\|\Lambda'_h\| \leq 2$  and  $\|\Lambda_h'^{-1}\| = 1/\lambda_{\min}(\Lambda'_h) \leq 2H^2/\kappa$ . Similarly, one can show  $\|\hat{\Lambda}_h'^{-1}\| \leq 2H^2/\kappa$  with high probability.

Now apply Lemma G.4 to  $\hat{\Lambda}_h'$  and  $\Lambda'_h$  and a union bound, we obtain with probability  $1 - \delta$ , for all  $s, a$

$$\begin{aligned}
\|\phi(s,a)\|_{\hat{\Lambda}_h'^{-1}} &\leq \left[1 + \sqrt{\|\Lambda_h'^{-1}\| \|\Lambda'_h\| \cdot \|\hat{\Lambda}_h'^{-1}\| \cdot \|\hat{\Lambda}_h' - \Lambda'_h\|}\right] \cdot \|\phi(s,a)\|_{\Lambda_h'^{-1}} \\
&\leq \left[1 + \sqrt{\frac{2H^2}{\kappa} \cdot 1 \cdot \frac{2H^2}{\kappa} \cdot \|\hat{\Lambda}_h' - \Lambda'_h\|}\right] \cdot \|\phi(s,a)\|_{\Lambda_h'^{-1}} \\
&\leq \left[1 + \sqrt{\frac{48H^4}{\kappa^2} \left(\sqrt{\frac{H^4d}{\kappa K} \log\left(\frac{(\lambda+K)H}{\lambda\delta}\right)} + \lambda \frac{H^2\sqrt{d}}{\kappa K}\right)}\right] \cdot \|\phi(s,a)\|_{\Lambda_h'^{-1}} \\
&\leq \left[1 + \sqrt{\frac{96H^4}{\kappa^2} \sqrt{\frac{H^4d}{\kappa K} \log\left(\frac{(\lambda+K)H}{\lambda\delta}\right)}}\right] \cdot \|\phi(s,a)\|_{\Lambda_h'^{-1}} \leq 2 \|\phi(s,a)\|_{\Lambda_h'^{-1}}
\end{aligned}$$

where the third inequality uses equation 10 and the last and the second last inequality use  $K > \max\{\frac{\lambda^2}{\kappa \log((\lambda+K)H/\lambda\delta)}, 96^2 H^{12} d \log((\lambda+K)H/\lambda\delta)/\kappa^5\}$ . Note the above is equivalent to  $\sqrt{\phi(s,a)\hat{\Lambda}_h'^{-1}\phi(s,a)} \leq 2\sqrt{\phi(s,a)\Lambda_h'^{-1}\phi(s,a)}$  by multiplying  $1/\sqrt{K}$  on both sides.

□

### C.2.2 ANALYZING THE TERM $\|\sum_{\tau=1}^K x_\tau \eta_\tau\|_{\hat{\Lambda}^{-1}}$

**Lemma C.4.** Recall  $x_\tau = \frac{\phi(s_h^\tau, a_h^\tau)}{\hat{\sigma}(s_h^\tau, a_h^\tau)}$  and  $\eta_\tau = \left(r_h^\tau + \hat{V}_{h+1}(s_{h+1}^\tau) - (\mathcal{T}_h \hat{V}_{h+1})(s_h^\tau, a_h^\tau)\right) / \hat{\sigma}(s_h^\tau, a_h^\tau)$ .

Let  $C_{H,d,\kappa} := 12\sqrt{H^4d \log((\lambda+K)H/\lambda\delta)}/\kappa$  and denote

$$\xi := \sup_{V \in [0,H], s' \sim P_h(s,a), h \in [H]} \left| \frac{r_h + V(s') - (\mathcal{T}_h V)(s,a)}{\sigma_V(s,a)} \right|.$$

If  $K \geq 4C_{H,d,\kappa}^2$ , then with probability  $1 - \delta$ ,

$$\left\| \sum_{\tau=1}^K x_\tau \eta_\tau \right\|_{\hat{\Lambda}^{-1}} \leq 16 \sqrt{d \log\left(1 + \frac{K}{\lambda d}\right) \cdot \log\left(\frac{4K^2}{\delta}\right)} + 4\xi \log\left(\frac{4K^2}{\delta}\right) \leq \tilde{O} \max\{\sqrt{d}, \xi\},$$

where  $\tilde{O}$  absorbs the constants and Polylog terms.

*Proof of Lemma C.4.* By construction, we have  $\|x_\tau\| \leq \|\phi/\hat{\sigma}\| \leq 1$  and by Lemma C.7, with probability  $1 - \delta/3$ ,

$$\left\| \sigma_{\hat{V}_{h+1}} - \hat{\sigma}_h \right\|_\infty = \sup_{s,a} \left| \frac{\sigma_{\hat{V}_{h+1}}^2(s,a) - \hat{\sigma}_h^2(s,a)}{\sigma_{\hat{V}_{h+1}}(s,a) + \hat{\sigma}_h(s,a)} \right| \leq \frac{1}{2} \left\| \sigma_{\hat{V}_{h+1}}^2 - \hat{\sigma}_h^2 \right\|_\infty \leq C_{H,d,\kappa} \sqrt{\frac{1}{K}}$$

Therefore, when  $K \geq 4C_{H,d,\kappa}^2$ ,  $C_{H,d,\kappa} \sqrt{\frac{1}{K}} \leq 1/2 \leq \sigma_{\hat{V}_{h+1}}(s_h^\tau, a_h^\tau)/2$  and hence

$$\begin{aligned} |\eta_\tau| &\leq \left| \frac{r_h^\tau + \hat{V}_{h+1}(s_{h+1}^\tau) - (\mathcal{T}_h \hat{V}_{h+1})(s_h^\tau, a_h^\tau)}{\sigma_{\hat{V}_{h+1}}(s_h^\tau, a_h^\tau) - \frac{C_{H,d,\kappa}}{K^{1/2}}} \right| \leq 2 \left| \frac{r_h^\tau + \hat{V}_{h+1}(s_{h+1}^\tau) - (\mathcal{T}_h \hat{V}_{h+1})(s_h^\tau, a_h^\tau)}{\sigma_{\hat{V}_{h+1}}(s_h^\tau, a_h^\tau)} \right| \\ &\leq 2 \sup_{V \in [0,H], s' \sim P_h(s,a)} \left| \frac{r + V(s') - (\mathcal{T}_h V)(s,a)}{\sigma_V(s,a)} \right| := \xi. \end{aligned}$$

Next, note  $\hat{V}_{h+1}$  is estimated using the transition from  $h+1$  to  $H$  and  $\hat{\sigma}_h$  is estimated using independent episodes  $\mathcal{D}'$ , therefore conditional on  $\hat{V}_{h+1}$ , we receive

$$\begin{aligned} \text{Var}[\eta_\tau | \mathcal{F}_{\tau-1}] &= \text{Var}[\eta_\tau | s_h^\tau, a_h^\tau, \hat{V}_{h+1}] = \frac{\text{Var}[r_h^\tau + \hat{V}_{h+1}(s_{h+1}^\tau) - (\mathcal{T}_h \hat{V}_{h+1})(s_h^\tau, a_h^\tau) | s_h^\tau, a_h^\tau, \hat{V}_{h+1}]}{\hat{\sigma}^2(s_h^\tau, a_h^\tau)} \\ &= \frac{\text{Var}_{\hat{V}_{h+1}}(s_h^\tau, a_h^\tau)}{\hat{\sigma}^2(s_h^\tau, a_h^\tau)} \leq \frac{2\text{Var}_{\hat{V}_{h+1}}(s_h^\tau, a_h^\tau)}{\sigma_{\hat{V}_{h+1}}^2(s_h^\tau, a_h^\tau)} \leq 2 \end{aligned}$$

where the first inequality is by Lemma C.7 and the second one is by definition of  $\sigma_{h,V}(s,a)^2 := \max\{1, \text{Var}_{P_h}(V)(s,a)\}$ . Thus, by Bernstein inequality for self-normalized martingale (Lemma G.3),<sup>10</sup> with probability  $1 - \delta$ ,

$$\left\| \sum_{\tau=1}^K x_\tau \eta_\tau \right\|_{\hat{\Lambda}^{-1}} \leq 16 \sqrt{d \log \left( 1 + \frac{K}{\lambda d} \right) \cdot \log \left( \frac{4K^2}{\delta} \right)} + 4\xi \log \left( \frac{4K^2}{\delta} \right) \leq \tilde{O} \max\{\sqrt{d}, \xi\}$$

where  $\tilde{O}$  absorbs the constants and Polylog terms.  $\square$

Recall  $\mathcal{M}_1, \mathcal{M}_2, \mathcal{M}_3, \mathcal{M}_4$  in List A. Based on the above results, we have the following key lemma:

**Lemma C.5.** Assume  $K > \max\{\mathcal{M}_1, \mathcal{M}_2, \mathcal{M}_3, \mathcal{M}_4\}$ , for any  $0 < \lambda < \kappa$ , suppose  $\sqrt{d} > \xi$ , where  $\xi := \sup_{V \in [0,H], s' \sim P_h(s,a), h \in [H]} \left| \frac{r_h + V(s') - (\mathcal{T}_h V)(s,a)}{\sigma_V(s,a)} \right|$ . Then with probability  $1 - \delta$ , for all  $h, s, a \in [H] \times \mathcal{S} \times \mathcal{A}$ ,

$$\left| (\mathcal{T}_h \hat{V}_{h+1} - \hat{\mathcal{T}}_h \hat{V}_{h+1})(s,a) \right| \leq \tilde{O} \left( \sqrt{d} \sqrt{\phi(s,a) \Lambda_h^{-1} \phi(s,a)} \right) + \frac{2H^3 \sqrt{d}}{K},$$

where  $\Lambda_h = \sum_{\tau=h}^K \phi(s_h^\tau, a_h^\tau)^\top \phi(s_h^\tau, a_h^\tau) / \sigma_{\hat{V}_{h+1}}^2(s_h^\tau, a_h^\tau) + \lambda I$  and  $\tilde{O}$  absorbs the universal constants and Polylog terms.

*Proof of Lemma C.5.* Combing equation 8, Lemma C.2, equation 9, Lemma C.3 and C.4 and a union bound to finish the proof.  $\square$

<sup>10</sup>To be rigorous, Lemma G.3 needs to be modified since the absolute value bound and the variance bound here are in the high probability sense. However, this will not affect the validity of the result as the weaker version can also be obtained (see Chung & Lu (2006) and a related discussion in Yin et al. (2021) Remark E.7.) To make the proof more readable, we do not include them here to avoid over-technicality.

### C.3 PROOF OF THE FIRST PART OF THEOREM 3.2

**Theorem C.6** (First part of Theorem 3.2). *Let  $K$  be the number of episodes. Suppose  $\sqrt{d} > \xi$ , where  $\xi := \sup_{V \in [0, H], s' \sim P_h(s, a), h \in [H]} \left| \frac{r_h + V(s') - (\mathcal{T}_h V)(s, a)}{\sigma_V(s, a)} \right|$  and  $K > \max\{\mathcal{M}_1, \mathcal{M}_2, \mathcal{M}_3, \mathcal{M}_4\}$ <sup>11</sup>. Then for any  $0 < \lambda < \kappa$ , with probability  $1 - \delta$ , for all policy  $\pi$  simultaneously, the output  $\hat{\pi}$  of Algorithm 1 satisfies*

$$v^\pi - v^{\hat{\pi}} \leq \tilde{O} \left( \sqrt{d} \cdot \sum_{h=1}^H \mathbb{E}_\pi \left[ (\phi(\cdot, \cdot)^\top \Lambda_h^{-1} \phi(\cdot, \cdot))^{1/2} \right] \right) + \frac{2H^4 \sqrt{d}}{K}$$

where  $\Lambda_h = \sum_{\tau=1}^K \frac{\phi(s_h^\tau, a_h^\tau) \cdot \phi(s_h^\tau, a_h^\tau)^\top}{\sigma_{\hat{V}_{h+1}}^2(s_h^\tau, a_h^\tau)} + \lambda I_d$  and  $\tilde{O}$  absorbs the universal constants and the Polylog terms.

*Proof of Theorem C.6.* Combing Lemma C.1 and Lemma C.5, we directly have with probability  $1 - \delta$ , for all policy  $\pi$  simultaneously,

$$V_1^\pi(s) - V_1^{\hat{\pi}}(s) \leq \tilde{O} \left( \sqrt{d} \cdot \sum_{h=1}^H \mathbb{E}_\pi \left[ (\phi(\cdot, \cdot)^\top \Lambda_h^{-1} \phi(\cdot, \cdot))^{1/2} \middle| s_1 = s \right] \right) + \frac{2H^4 \sqrt{d}}{K}, \quad (11)$$

now take the initial distribution  $d_1$  on both sides to get the stated result.  $\square$

### C.4 TWO INTERMEDIATE RESULTS

The next two lemmas provide intermediate results in finishing the whole proofs.

#### C.4.1 BOUNDING THE VARIANCE

**Lemma C.7.** *Recall the definition  $\hat{\sigma}_h(\cdot, \cdot)^2 = \max\{1, \widehat{\text{Var}}_{P_h} \hat{V}_{h+1}(\cdot, \cdot)\} + 1$  and  $\sigma_{\hat{V}_{h+1}}(\cdot, \cdot)^2 := \max\{1, \text{Var}_{P_h} \hat{V}_{h+1}(\cdot, \cdot)\} + 1$ . Moreover,  $[\widehat{\text{Var}}_h \hat{V}_{h+1}](\cdot, \cdot) = \langle \phi(\cdot, \cdot), \bar{\beta}_h \rangle_{[0, (H-h+1)^2]} - [\langle \phi(\cdot, \cdot), \bar{\theta}_h \rangle_{[0, H-h+1]}]^2$  (where  $\bar{\beta}_h$  and  $\bar{\theta}_h$  are defined in Algorithm 1). Let  $K \geq \max\{512(1/\kappa)^2 \log(\frac{4Hd}{\delta}), 4\lambda/\kappa\}$ , then with probability  $1 - \delta$ ,*

$$\sup_h \|\hat{\sigma}_h^2 - \sigma_{\hat{V}_{h+1}}^2\|_\infty \leq 12 \sqrt{\frac{H^4 d}{\kappa K} \log\left(\frac{(\lambda + K)H}{\lambda \delta}\right)} + 12\lambda \frac{H^2 \sqrt{d}}{\kappa K}.$$

*Proof. Step1:* we first show for all  $h, s, a \in [H] \times \mathcal{S} \times \mathcal{A}$ , with probability  $1 - \delta$

$$\left| \langle \phi(s, a), \bar{\beta}_h \rangle_{[0, (H-h+1)^2]} - \mathbb{P}_h(\hat{V}_{h+1})^2(s, a) \right| \leq 4 \sqrt{\frac{H^4 d}{\kappa K} \log\left(\frac{(\lambda + K)H}{\lambda \delta}\right)} + 4\lambda \frac{H^2 \sqrt{d}}{\kappa K}.$$

**Proof of Step1.** Note

$$\begin{aligned} & \left| \langle \phi(s, a), \bar{\beta}_h \rangle_{[0, (H-h+1)^2]} - \mathbb{P}_h(\hat{V}_{h+1})^2(s, a) \right| \leq \left| \langle \phi(s, a), \bar{\beta}_h \rangle - \mathbb{P}_h(\hat{V}_{h+1})^2(s, a) \right| \\ &= \left| \phi(s, a)^\top \bar{\Sigma}_h^{-1} \sum_{\tau=1}^K \phi(\bar{s}_h^\tau, \bar{a}_h^\tau) \cdot \hat{V}_{h+1}(\bar{s}_{h+1}^\tau)^2 - \mathbb{P}_h(\hat{V}_{h+1})^2(s, a) \right| \\ &= \left| \phi(s, a)^\top \bar{\Sigma}_h^{-1} \sum_{\tau=1}^K \phi(\bar{s}_h^\tau, \bar{a}_h^\tau) \cdot \hat{V}_{h+1}(\bar{s}_{h+1}^\tau)^2 - \phi(s, a)^\top \int_{\mathcal{S}} (\hat{V}_{h+1})^2(s') d\nu_h(s') \right| \\ &= \left| \phi(s, a)^\top \bar{\Sigma}_h^{-1} \sum_{\tau=1}^K \phi(\bar{s}_h^\tau, \bar{a}_h^\tau) \cdot \hat{V}_{h+1}(\bar{s}_{h+1}^\tau)^2 - \phi(s, a)^\top \bar{\Sigma}_h^{-1} \left( \sum_{\tau=1}^K \phi(\bar{s}_h^\tau, \bar{a}_h^\tau) \phi(\bar{s}_h^\tau, \bar{a}_h^\tau)^\top + \lambda I \right) \int_{\mathcal{S}} (\hat{V}_{h+1})^2(s') d\nu_h(s') \right| \\ &\leq \underbrace{\left| \phi(s, a)^\top \bar{\Sigma}_h^{-1} \sum_{\tau=1}^K \phi(\bar{s}_h^\tau, \bar{a}_h^\tau) \cdot (\hat{V}_{h+1}(\bar{s}_{h+1}^\tau)^2 - \mathbb{P}_h(\hat{V}_{h+1})^2(\bar{s}_h^\tau, \bar{a}_h^\tau)) \right|}_{\textcircled{1}} + \lambda \underbrace{\left| \phi(s, a)^\top \bar{\Sigma}_h^{-1} \int_{\mathcal{S}} (\hat{V}_{h+1})^2(s') d\nu_h(s') \right|}_{\textcircled{2}} \end{aligned}$$

<sup>11</sup>The definition of  $\mathcal{M}_i$  is in List A.

For ②, since  $K \geq \max \{512(1/\kappa)^2 \log \left( \frac{4Hd}{\delta} \right), 4\lambda/\kappa\}$ , by Lemma G.6 and a union bound over  $h \in [H]$ , with probability  $1 - \delta$  for all  $h, s, a \in [H] \times \mathcal{S} \times \mathcal{A}$ ,

$$\begin{aligned} \textcircled{2} &\leq \lambda \|\phi(s, a)\|_{\bar{\Sigma}_h^{-1}} \left\| \int_{\mathcal{S}} (\hat{V}_{h+1})^2(s') d\nu_h(s') \right\|_{\bar{\Sigma}_h^{-1}} \\ &\leq \lambda \frac{2}{\sqrt{K}} \|\phi(s, a)\|_{(\Sigma_h^p)^{-1}} \frac{2}{\sqrt{K}} \left\| \int_{\mathcal{S}} (\hat{V}_{h+1})^2(s') d\nu_h(s') \right\|_{(\Sigma_h^p)^{-1}} \leq 4\lambda \|(\Sigma_h^p)^{-1}\| \frac{H^2 \sqrt{d}}{K} \leq 4\lambda \frac{H^2 \sqrt{d}}{\kappa K}. \end{aligned} \quad (12)$$

For ①, we have

$$\textcircled{1} \leq \|\phi(s, a)\|_{\bar{\Sigma}_h^{-1}} \left\| \sum_{\tau=1}^K \phi(\bar{s}_h^\tau, \bar{a}_h^\tau) \cdot \left( \hat{V}_{h+1}(\bar{s}_{h+1}^\tau)^2 - \mathbb{P}_h(\hat{V}_{h+1})^2(\bar{s}_h^\tau, \bar{a}_h^\tau) \right) \right\|_{\bar{\Sigma}_h^{-1}} \quad (13)$$

Note  $\hat{V}_{h+1}$  leverages the random transition from time  $t+1$  to  $H$ , therefore conditional on  $\hat{V}_{h+1}$ , the transitions  $(\bar{s}_h^\tau, \bar{a}_h^\tau, \bar{s}_{h+1}^\tau)$  are conditional independent w.r.t to different  $\tau$ . Thus, define  $x_\tau = \phi(\bar{s}_h^\tau, \bar{a}_h^\tau)$  ( $\|\phi\|_2 \leq 1$ ) and  $\eta_\tau = \hat{V}_{h+1}(\bar{s}_{h+1}^\tau)^2 - \mathbb{P}_h(\hat{V}_{h+1})^2(\bar{s}_h^\tau, \bar{a}_h^\tau)$  is  $H^2$ -subgaussian, by Lemma G.2 (where  $t = K$  and  $L = 1$ ) with probability  $1 - \delta$ ,<sup>12</sup>

$$\mathbb{P} \left( \left\| \sum_{\tau=1}^K \phi(\bar{s}_h^\tau, \bar{a}_h^\tau) \cdot \left( \hat{V}_{h+1}(\bar{s}_{h+1}^\tau)^2 - \mathbb{P}_h(\hat{V}_{h+1})^2(\bar{s}_h^\tau, \bar{a}_h^\tau) \right) \right\|_{\bar{\Sigma}_h^{-1}} \leq \sqrt{8H^4 \cdot \frac{d}{2} \log \left( \frac{\lambda + K}{\lambda \delta} \right)} \left| \hat{V}_{h+1} \right| \right) \geq 1 - \delta.$$

$$\text{Denote } A := \left\{ \left\| \sum_{\tau=1}^K \phi(\bar{s}_h^\tau, \bar{a}_h^\tau) \cdot \left( \hat{V}_{h+1}(\bar{s}_{h+1}^\tau)^2 - \mathbb{P}_h(\hat{V}_{h+1})^2(\bar{s}_h^\tau, \bar{a}_h^\tau) \right) \right\|_{\bar{\Sigma}_h^{-1}} \leq \sqrt{8H^4 \cdot \frac{d}{2} \log \left( \frac{\lambda + K}{\lambda \delta} \right)} \right\},$$

then  $\mathbb{P}(A) = \mathbb{E}[\mathbf{1}(A)] = \mathbb{E}[\mathbb{E}[\mathbf{1}(A) | \hat{V}_{h+1}]] = \mathbb{E}[\mathbb{P}(A | \hat{V}_{h+1})] \geq \mathbb{E}[1 - \delta] = 1 - \delta$ . Apply a union bound for  $h \in [H]$ , we have with probability  $1 - \delta$ , for all  $h \in [H]$ ,

$$\left\| \sum_{\tau=1}^K \phi(\bar{s}_h^\tau, \bar{a}_h^\tau) \cdot \left( \hat{V}_{h+1}(\bar{s}_{h+1}^\tau)^2 - \mathbb{P}_h(\hat{V}_{h+1})^2(\bar{s}_h^\tau, \bar{a}_h^\tau) \right) \right\|_{\bar{\Sigma}_h^{-1}} \leq \sqrt{4H^4 d \log \left( \frac{(\lambda + K)H}{\lambda \delta} \right)} \quad (14)$$

and similar to ②, with probability  $1 - \delta$  for all  $h, s, a \in [H] \times \mathcal{S} \times \mathcal{A}$ ,

$$\|\phi(s, a)\|_{\bar{\Sigma}_h^{-1}} \leq \frac{2 \|(\Sigma_h^p)^{-1}\|^{1/2}}{\sqrt{K}} \leq \frac{2}{\sqrt{\kappa K}}. \quad (15)$$

Combing equation 12, equation 13, equation 14 and equation 15 we obtain with probability  $1 - \delta$  for all  $h, s, a \in [H] \times \mathcal{S} \times \mathcal{A}$ ,

$$\left| \langle \phi(s, a), \bar{\beta}_h \rangle_{[0, (H-h+1)^2]} - \mathbb{P}_h(\hat{V}_{h+1})^2(s, a) \right| \leq 4 \sqrt{\frac{H^4 d}{\kappa K} \log \left( \frac{(\lambda + K)H}{\lambda \delta} \right)} + 4\lambda \frac{H^2 \sqrt{d}}{\kappa K}.$$

**Step2:** we show for all  $h, s, a \in [H] \times \mathcal{S} \times \mathcal{A}$ , with probability  $1 - \delta$

$$\left| \langle \phi(s, a), \bar{\theta}_h \rangle_{[0, H-h+1]} - \mathbb{P}_h(\hat{V}_{h+1})(s, a) \right| \leq 4 \sqrt{\frac{H^2 d}{\kappa K} \log \left( \frac{(\lambda + K)H}{\lambda \delta} \right)} + 4\lambda \frac{H \sqrt{d}}{\kappa K}. \quad (16)$$

The proof of Step2 follows nearly the identical way as Step1 except  $\hat{V}_h^2$  is replaced by  $\hat{V}_h$ .

**Step3:** We prove  $\sup_h \|\hat{\sigma}_h^2 - \sigma_{\hat{V}_h}^2\|_\infty \leq 12 \sqrt{\frac{H^4 d}{\kappa K} \log \left( \frac{(\lambda + K)H}{\lambda \delta} \right)} + 12\lambda \frac{H^2 \sqrt{d}}{\kappa K}$ .

<sup>12</sup>Note similar technique is applied in Cai et al. (2020) Lemma D.1.

**Proof of Step3.** By equation 16,

$$\begin{aligned}
& \left| \left[ \langle \phi(\cdot, \cdot), \bar{\theta}_h \rangle_{[0, H-h+1]} \right]^2 - \left[ \mathbb{P}_h(\widehat{V}_{h+1})(s, a) \right]^2 \right| \\
&= \left| \langle \phi(s, a), \bar{\theta}_h \rangle_{[0, H-h+1]} + \mathbb{P}_h(\widehat{V}_{h+1})(s, a) \right| \cdot \left| \langle \phi(s, a), \bar{\theta}_h \rangle_{[0, H-h+1]} - \mathbb{P}_h(\widehat{V}_{h+1})(s, a) \right| \\
&\leq 2H \cdot \left| \langle \phi(s, a), \bar{\theta}_h \rangle_{[0, H-h+1]} - \mathbb{P}_h(\widehat{V}_{h+1})(s, a) \right| \leq 8\sqrt{\frac{H^4 d}{\kappa K} \log \left( \frac{(\lambda + K)H}{\lambda \delta} \right)} + 8\lambda \frac{H^2 \sqrt{d}}{\kappa K}.
\end{aligned}$$

Combining this with Step1 we receive  $\forall h, s, a \in [H] \times \mathcal{S} \times \mathcal{A}$ , with probability  $1 - \delta$

$$\left| \widehat{\text{Var}}_h \widehat{V}_{h+1}(s, a) - \text{Var}_{P_h} \widehat{V}_{h+1}(s, a) \right| \leq 12\sqrt{\frac{H^4 d}{\kappa K} \log \left( \frac{(\lambda + K)H}{\lambda \delta} \right)} + 12\lambda \frac{H^2 \sqrt{d}}{\kappa K}.$$

Finally, by the non-expansiveness of operator  $\max\{1, \cdot\} + 1$ , we have the stated result.  $\square$

**C.4.2 A CRUDE BOUND ON  $\sup_h \|V_h^* - \widehat{V}_h\|_\infty$ .**

**Lemma C.8.** Define  $\widehat{\sigma}_h(s, a) = \sqrt{\max\{1, \widehat{\text{Var}}_{P_h} \widehat{V}_{h+1}(s, a)\} + 1}$ , if  $K \geq \max\{\mathcal{M}_1, \mathcal{M}_2, \mathcal{M}_3, \mathcal{M}_4\}$  and  $K > C \cdot H^4 \kappa^2$ , then with probability at least  $1 - \delta$ ,

$$\sup_h \|V_h^* - \widehat{V}_h\|_\infty \leq \tilde{O} \left( \frac{H^2 \sqrt{d}}{\sqrt{\kappa K}} \right).$$

*Proof. Step1:* We show with probability at least  $1 - \delta$ ,  $\sup_h \|V_h^* - V_h^{\widehat{\pi}}\|_\infty \leq \tilde{O} \left( \frac{H^2 \sqrt{d}}{\sqrt{\kappa K}} \right)$ .

Indeed, combing Lemma C.1 and Lemma C.5, similar to the proof of Theorem C.6, we directly have with probability  $1 - \delta$ , for all policy  $\pi$  simultaneously, and for all  $s \in \mathcal{S}$ ,  $h \in [H]$

$$V_h^\pi(s) - V_h^{\widehat{\pi}}(s) \leq \tilde{O} \left( \sqrt{d} \cdot \sum_{t=h}^H \mathbb{E}_\pi \left[ (\phi(\cdot, \cdot)^\top \Lambda_t^{-1} \phi(\cdot, \cdot))^{1/2} \middle| s_h = s \right] \right) + \frac{2H^4 \sqrt{d}}{K}, \quad (17)$$

Next, since  $K \geq \max\{512(1/\kappa)^2 \log(\frac{4Hd}{\delta}), 4\lambda/\kappa\}$ , by Lemma G.6 and a union bound over  $h \in [H]$ , with probability  $1 - \delta$

$$\sup_{s, a} \|\phi(s, a)\|_{\widehat{\Lambda}_h^{-1}} \leq \frac{2}{\sqrt{K}} \sup_{s, a} \|\phi(s, a)\|_{\Lambda_h^{p-1}} \leq \frac{2H}{\sqrt{\kappa K}}, \quad \forall h \in [H].$$

Lastly, taking  $\pi = \pi^*$  in equation 17 to obtain

$$\begin{aligned}
0 \leq V_h^{\pi^*}(s) - V_h^{\widehat{\pi}}(s) &\leq \tilde{O} \left( \sqrt{d} \cdot \sum_{t=h}^H \mathbb{E}_{\pi^*} \left[ (\phi(\cdot, \cdot)^\top \Lambda_t^{-1} \phi(\cdot, \cdot))^{1/2} \middle| s_h = s \right] \right) + \frac{2H^4 \sqrt{d}}{K} \\
&\leq \tilde{O} \left( \frac{H^2 \sqrt{d}}{\sqrt{\kappa K}} \right) + \frac{2H^4 \sqrt{d}}{K}.
\end{aligned} \quad (18)$$

This implies by using the condition  $K > C \cdot H^4 \kappa^2$ , we finish the proof of Step1.

**Step2:** We show with probability  $1 - \delta$ ,  $\sup_h \|\widehat{V}_h - V_h^{\widehat{\pi}}\|_\infty \leq \tilde{O} \left( \frac{H^2 \sqrt{d}}{\sqrt{\kappa K}} \right)$ .

Indeed, applying Extended Value Difference Lemma G.7 for  $\pi = \pi' = \hat{\pi}$ , then with probability  $1 - \delta$ , for all  $s, h$

$$\begin{aligned} \left| \hat{V}_h(s) - V_h^{\hat{\pi}}(s) \right| &= \left| \sum_{t=h}^H \mathbb{E}_{\hat{\pi}} \left[ \hat{Q}_h(s_h, a_h) - (\mathcal{T}_h \hat{V}_{h+1})(s_h, a_h) \mid s_h = s \right] \right| \\ &\leq \sum_{t=h}^H \left\| (\hat{\mathcal{T}}_h \hat{V}_{h+1} - \mathcal{T}_h \hat{V}_{h+1})(s, a) \right\| + \|\Gamma_h(s, a)\| \\ &\leq \tilde{O} \left( H\sqrt{d} \left\| \sqrt{\phi(s, a) \Lambda_h^{-1} \phi(s, a)} \right\| \right) + \frac{4H^4\sqrt{d}}{K} \leq \tilde{O} \left( \frac{H^2\sqrt{d}}{\sqrt{\kappa K}} \right) \end{aligned}$$

where the second inequality uses Lemma C.5 and the last inequality follows the same procedure as Step1.

**Step3:** Combine Step1 and Step2, by triangular inequality and a union bound we finish the proof of the lemma.  $\square$

**Remark C.9.** Note as an intermediate calculation, equation 18 ensures a learning bound with order  $\tilde{O}(\frac{H^2\sqrt{d}}{\sqrt{\kappa K}})$ . Here, the convergence rate is the standard statistical rate  $\frac{1}{\sqrt{K}}$  and the  $H^2$  dependence is loose. However, the feature dependence  $\sqrt{d/\kappa}$  is roughly tight, since, in the well-explored case (Assumption 2 of Wang et al. (2021a)),  $\kappa = 1/d$  and the  $\sqrt{d/\kappa} = \sqrt{d^2}$  recovers the optimal feature dependence  $dH\sqrt{T}$  in the online setting (Zhou et al., 2021). If  $\kappa \ll 1/d$ , then doing offline learning requires sample size proportional to  $d/\kappa$ , which reveals offline RL is harder when the exploration of behavior policy is insufficient. When  $\kappa = 0$ , learning the optimal policy accurately cannot be guaranteed even if the sample/episode size  $K \rightarrow \infty$ .

### C.5 PROOF OF THE SECOND PART OF THEOREM 3.2

**Lemma C.10.** Recall  $\hat{\sigma}_h = \sqrt{\max\{1, \widehat{\text{Var}}_{P_h} \hat{V}_{h+1}\} + 1}$  and  $\sigma_h^* = \sqrt{\max\{1, \text{Var}_{P_h} V_{h+1}^*\} + 1}$ . Let  $K \geq \max\{512(1/\kappa)^2 \log(\frac{4Hd}{\delta}), 4\lambda/\kappa\}$  and  $K \geq \max\{\mathcal{M}_1, \mathcal{M}_2, \mathcal{M}_3, \mathcal{M}_4\}$ , then with probability  $1 - \delta$ ,

$$\sup_h \|\hat{\sigma}_h^2 - \sigma_h^{*2}\|_\infty \leq \tilde{O} \left( \frac{H^3\sqrt{d}}{\sqrt{\kappa K}} \right).$$

*Proof.* By definition and the non-expansiveness of  $\max\{1, \cdot\} + 1$ , we have

$$\begin{aligned} \left\| \sigma_{\hat{V}_{h+1}}^2 - \sigma_h^{*2} \right\|_\infty &\leq \left\| \text{Var} \hat{V}_{h+1} - \text{Var} V_{h+1}^* \right\|_\infty \\ &\leq \left\| \mathbb{P}_h \left( \hat{V}_{h+1}^2 - V_{h+1}^{*2} \right) \right\|_\infty + \left\| (\mathbb{P}_h \hat{V}_{h+1})^2 - (\mathbb{P}_h V_{h+1}^*)^2 \right\|_\infty \\ &\leq \left\| \hat{V}_{h+1}^2 - V_{h+1}^{*2} \right\|_\infty + \left\| (\mathbb{P}_h \hat{V}_{h+1} + \mathbb{P}_h V_{h+1}^*)(\mathbb{P}_h \hat{V}_{h+1} - \mathbb{P}_h V_{h+1}^*) \right\|_\infty \\ &\leq 2H \left\| \hat{V}_{h+1} - V_{h+1}^* \right\|_\infty + 2H \left\| \mathbb{P}_h \hat{V}_{h+1} - \mathbb{P}_h V_{h+1}^* \right\|_\infty \leq \tilde{O} \left( \frac{H^3\sqrt{d}}{\sqrt{\kappa K}} \right). \end{aligned}$$

with probability  $1 - \delta$  for all  $h \in [H]$ , where the last inequality comes from Lemma C.8. Combining this with Lemma C.7, we have the stated result.  $\square$

**Lemma C.11.** Denote the quantities  $C_1 = \max\{2\lambda, 128 \log(2d/\delta), 128H^4 \log(2d/\delta)/\kappa^2\}$  and  $C_2 = \max\{\frac{\lambda^2}{\kappa \log((\lambda+K)H/\lambda\delta)}, 96^2 H^{12} d \log((\lambda+K)H/\lambda\delta)/\kappa^5\}$ . Suppose the number of episode  $K$  satisfies  $K > \max\{C_1, C_2\}$ , then with probability  $1 - \delta$ ,

$$\sqrt{\phi(s, a) \Lambda_h^{-1} \phi(s, a)} \leq 2\sqrt{\phi(s, a) \Lambda_h^{*-1} \phi(s, a)}, \quad \forall s, a \in \mathcal{S} \times \mathcal{A},$$

*Proof of Lemma C.11.* By definition  $\sqrt{\phi(s, a)\Lambda_h^{-1}\phi(s, a)} = \|\phi(s, a)\|_{\Lambda_h^{-1}}$ . Then denote

$$\Lambda'_h = \frac{1}{K}\Lambda_h, \quad \Lambda_h^{\star'} = \frac{1}{K}\Lambda_h^*,$$

where  $\Lambda_h = \sum_{\tau=1}^K \phi(s_h^\tau, a_h^\tau) \phi(s_h^\tau, a_h^\tau)^\top / \sigma_{V_{h+1}^*}^2(s_h^\tau, a_h^\tau) + \lambda I$ . Under the condition of  $K$ , by Lemma C.10, with probability  $1 - \delta$

$$\begin{aligned} \|\Lambda_h^{\star'} - \Lambda'_h\| &\leq \sup_{s,a} \left\| \frac{\phi(s,a)\phi(s,a)^\top}{\sigma_h^{\star 2}(s,a)} - \frac{\phi(s,a)\phi(s,a)^\top}{\sigma_{\hat{V}_{h+1}}^2(s,a)} \right\| \\ &\leq \sup_{s,a} \left| \frac{\sigma_h^{\star 2}(s,a) - \sigma_{\hat{V}_{h+1}}^2(s,a)}{\sigma_h^{\star 2}(s,a)\sigma_{\hat{V}_{h+1}}^2(s,a)} \right| \cdot \|\phi(s,a)\|^2 \leq \sup_{s,a} \left| \frac{\sigma_h^{\star 2}(s,a) - \sigma_{\hat{V}_{h+1}}^2(s,a)}{1} \right| \cdot 1 \\ &\leq \tilde{O}\left(\frac{H^3\sqrt{d}}{\sqrt{\kappa K}}\right). \end{aligned} \quad (19)$$

Next by Lemma G.5 (with  $\phi$  to be  $\phi/\sigma_{V_{h+1}^*}$  and  $C = 1$ ), it holds with probability  $1 - \delta$ ,

$$\left\| \Lambda_h^{\star'} - \left( \mathbb{E}_{\mu,h}[\phi(s,a)\phi(s,a)^\top / \sigma_{V_{h+1}^*}^2(s,a)] + \frac{\lambda}{K} I_d \right) \right\| \leq \frac{4\sqrt{2}}{\sqrt{K}} \left( \log \frac{2d}{\delta} \right)^{1/2}.$$

Therefore by Weyl's spectrum theorem and the condition  $K > \max\{2\lambda, 128 \log(2d/\delta), 128H^4 \log(2d/\delta)/\kappa^2\}$ , the above implies

$$\begin{aligned} \|\Lambda_h^{\star'}\| &= \lambda_{\max}(\Lambda_h^{\star'}) \leq \lambda_{\max}\left(\mathbb{E}_{\mu,h}[\phi(s,a)\phi(s,a)^\top / \sigma_{V_{h+1}^*}^2(s,a)]\right) + \frac{\lambda}{K} + \frac{4\sqrt{2}}{\sqrt{K}} \left( \log \frac{2d}{\delta} \right)^{1/2} \\ &\leq \left\| \mathbb{E}_{\mu,h}[\phi(s,a)\phi(s,a)^\top / \sigma_{V_{h+1}^*}^2(s,a)] \right\| + \frac{\lambda}{K} + \frac{4\sqrt{2}}{\sqrt{K}} \left( \log \frac{2d}{\delta} \right)^{1/2} \\ &\leq \|\phi(s,a)\|^2 + \frac{\lambda}{K} + \frac{4\sqrt{2}}{\sqrt{K}} \left( \log \frac{2d}{\delta} \right)^{1/2} \leq 1 + \frac{\lambda}{K} + \frac{4\sqrt{2}}{\sqrt{K}} \left( \log \frac{2d}{\delta} \right)^{1/2} \leq 2, \\ \lambda_{\min}(\Lambda_h^{\star'}) &\geq \lambda_{\min}\left(\mathbb{E}_{\mu,h}[\phi(s,a)\phi(s,a)^\top / \sigma_{V_{h+1}^*}^2(s,a)]\right) + \frac{\lambda}{K} - \frac{4\sqrt{2}}{\sqrt{K}} \left( \log \frac{2d}{\delta} \right)^{1/2} \\ &\geq \lambda_{\min}\left(\mathbb{E}_{\mu,h}[\phi(s,a)\phi(s,a)^\top / \sigma_{V_{h+1}^*}^2(s,a)]\right) - \frac{4\sqrt{2}}{\sqrt{K}} \left( \log \frac{2d}{\delta} \right)^{1/2} \\ &\geq \frac{\kappa}{H^2} - \frac{4\sqrt{2}}{\sqrt{K}} \left( \log \frac{2d}{\delta} \right)^{1/2} \geq \frac{\kappa}{2H^2}. \end{aligned}$$

Hence with probability  $1 - \delta$ ,  $\|\Lambda_h^{\star'}\| \leq 2$  and  $\|\Lambda_h^{\star'-1}\| = 1/\lambda_{\min}(\Lambda_h^{\star'}) \leq 2H^2/\kappa$ . Similarly,  $\|\Lambda_h^{\star'-1}\| \leq 2H^2/\kappa$  with high probability.

Now apply Lemma G.4 to  $\Lambda_h^{\star'}$  and  $\Lambda'_h$  and a union bound, we obtain with probability  $1 - \delta$ , for all  $s, a$

$$\begin{aligned} \|\phi(s,a)\|_{\Lambda_h^{\star'-1}} &\leq \left[ 1 + \sqrt{\|\Lambda_h^{\star'-1}\| \|\Lambda_h^{\star'}\| \cdot \|\Lambda_h^{\star'-1}\| \cdot \|\Lambda_h^{\star'} - \Lambda'_h\|} \right] \cdot \|\phi(s,a)\|_{\Lambda_h^{\star'-1}} \\ &\leq \left[ 1 + \sqrt{\frac{2H^2}{\kappa} \cdot 1 \cdot \frac{2H^2}{\kappa} \cdot \|\Lambda_h^{\star'} - \Lambda'_h\|} \right] \cdot \|\phi(s,a)\|_{\Lambda_h^{\star'-1}} \\ &\leq \left[ 1 + \sqrt{\frac{H^4}{\kappa^2} \left[ \tilde{O}\left(\frac{H^3\sqrt{d}}{\sqrt{\kappa K}}\right) \right]} \right] \cdot \|\phi(s,a)\|_{\Lambda_h^{\star'-1}} \leq 2 \|\phi(s,a)\|_{\Lambda_h^{\star'-1}} \end{aligned}$$

where the third inequality uses equation 19 and the last inequality uses  $K > \max\{\frac{\lambda^2}{\kappa \log((\lambda+K)H/\lambda\delta)}, 96^2 H^{12} d \log((\lambda+K)H/\lambda\delta)/\kappa^5\}$ . The claimed result follows straightforwardly by multiplying  $1/\sqrt{K}$  on both sides of the above.  $\square$

*Proof of Theorem 3.2.* The first part of the theorem has been shown in Theorem C.6. For the second part, apply Theorem C.6 with  $\pi = \pi^*$ , then with probability  $1 - \delta$ ,

$$v^{\pi^*} - v^{\hat{\pi}} \leq \tilde{O} \left( \sqrt{d} \cdot \sum_{h=1}^H \mathbb{E}_{\pi^*} \left[ (\phi(\cdot, \cdot)^\top \Lambda_h^{-1} \phi(\cdot, \cdot))^{1/2} \right] \right) + \frac{2H^4 \sqrt{d}}{K},$$

Now apply Lemma C.11 and a union bound, with probability  $1 - \delta$ ,

$$0 \leq v^* - v^{\hat{\pi}} \leq \tilde{O} \left( \sqrt{d} \cdot \sum_{h=1}^H \mathbb{E}_{\pi^*} \left[ (\phi(\cdot, \cdot)^\top \Lambda_h^{*-1} \phi(\cdot, \cdot))^{1/2} \right] \right) + \frac{2H^4 \sqrt{d}}{K}.$$

$\square$

## D PROOF OF THEOREM 3.3

First of all, we show the following lemma.

**Lemma D.1.** Suppose  $K > \max\{\mathcal{M}_1, \mathcal{M}_2, \mathcal{M}_3, \mathcal{M}_4\}$ . Plug

$$\Gamma_h^I(s, a) \leftarrow \phi(s, a)^\top \left| \hat{\Lambda}_h^{-1} \sum_{\tau=1}^K \frac{\phi(s_h^\tau, a_h^\tau) \cdot (r_h^\tau + \hat{V}_{h+1}(s_{h+1}^\tau) - (\hat{\mathcal{T}}_h \hat{V}_{h+1})(s_h^\tau, a_h^\tau))}{\hat{\sigma}_h^2(s_h^\tau, a_h^\tau)} \right| + \tilde{O}(\frac{H^3 d}{K})$$

in Algorithm 1 and let  $\mathcal{T}_h$  be the Bellman operator and  $\hat{\mathcal{T}}_h$  be the approximated Bellman operator. Then we have with probability  $1 - \delta$ :

$$|(\mathcal{T}_h \hat{V}_{h+1} - \hat{\mathcal{T}}_h \hat{V}_{h+1})(s, a)| \leq \Gamma_h(s, a) \quad \forall s, a \in \mathcal{S} \times \mathcal{A}.$$

*Proof of Lemma D.1.* Suppose  $w_h$  is the coefficient corresponding to the  $\mathcal{T}_h \hat{V}_{h+1}$  (such  $w_h$  exists by Lemma G.9), i.e.  $\mathcal{T}_h \hat{V}_{h+1} = \phi^\top w_h$ , and recall  $(\hat{\mathcal{T}}_h \hat{V}_{h+1})(s, a) = \phi(s, a)^\top \hat{w}_h$ , then:

$$\begin{aligned} & (\mathcal{T}_h \hat{V}_{h+1})(s, a) - (\hat{\mathcal{T}}_h \hat{V}_{h+1})(s, a) = \phi(s, a)^\top (w_h - \hat{w}_h) \\ &= \phi(s, a)^\top w_h - \phi(s, a)^\top \hat{\Lambda}_h^{-1} \left( \sum_{\tau=1}^K \phi(s_h^\tau, a_h^\tau) \cdot (r_h^\tau + \hat{V}_{h+1}(s_{h+1}^\tau)) / \hat{\sigma}_h^2(s_h^\tau, a_h^\tau) \right) \\ &= \underbrace{\phi(s, a)^\top w_h - \phi(s, a)^\top \hat{\Lambda}_h^{-1} \left( \sum_{\tau=1}^K \phi(s_h^\tau, a_h^\tau) \cdot (\mathcal{T}_h \hat{V}_{h+1})(s_h^\tau, a_h^\tau) / \hat{\sigma}_h^2(s_h^\tau, a_h^\tau) \right)}_{(i)} \\ & \quad + \underbrace{\phi(s, a)^\top \hat{\Lambda}_h^{-1} \left( \sum_{\tau=1}^K \phi(s_h^\tau, a_h^\tau) \cdot (r_h^\tau + \hat{V}_{h+1}(s_{h+1}^\tau) - (\hat{\mathcal{T}}_h \hat{V}_{h+1})(s_h^\tau, a_h^\tau)) / \hat{\sigma}_h^2(s_h^\tau, a_h^\tau) \right)}_{(ii)} \\ & \quad + \underbrace{\phi(s, a)^\top \hat{\Lambda}_h^{-1} \left( \sum_{\tau=1}^K \phi(s_h^\tau, a_h^\tau) \cdot ((\hat{\mathcal{T}}_h \hat{V}_{h+1})(s_h^\tau, a_h^\tau) - (\mathcal{T}_h \hat{V}_{h+1})(s_h^\tau, a_h^\tau)) / \hat{\sigma}_h^2(s_h^\tau, a_h^\tau) \right)}_{(iii)} \end{aligned} \tag{20}$$

For term (i), by Lemma C.2 it is bounded by  $\frac{2\lambda H^3 \sqrt{d}/\kappa}{K}$  with probability  $1 - \delta/2$ .<sup>13</sup>

For term (ii), it is bounded by

$$\phi(s, a)^\top \left| \hat{\Lambda}_h^{-1} \sum_{\tau=1}^K \frac{\phi(s_h^\tau, a_h^\tau) \cdot (r_h^\tau + \hat{V}_{h+1}(s_{h+1}^\tau) - (\hat{\mathcal{T}}_h \hat{V}_{h+1})(s_h^\tau, a_h^\tau))}{\hat{\sigma}_h^2(s_h^\tau, a_h^\tau)} \right|.$$

For term (iii), by Cauchy inequality

$$\begin{aligned} & \phi(s, a)^\top \hat{\Lambda}_h^{-1} \left( \sum_{\tau=1}^K \phi(s_h^\tau, a_h^\tau) \cdot \left( (\hat{\mathcal{T}}_h \hat{V}_{h+1})(s_h^\tau, a_h^\tau) - (\mathcal{T}_h \hat{V}_{h+1})(s_h^\tau, a_h^\tau) \right) / \hat{\sigma}_h^2(s_h^\tau, a_h^\tau) \right) \\ & \leq \|\phi(s, a)\|_{\hat{\Lambda}_h^{-1}} \cdot \left\| \sum_{\tau=1}^K \phi(s_h^\tau, a_h^\tau) \cdot \left( (\hat{\mathcal{T}}_h \hat{V}_{h+1})(s_h^\tau, a_h^\tau) - (\mathcal{T}_h \hat{V}_{h+1})(s_h^\tau, a_h^\tau) \right) / \hat{\sigma}_h^2(s_h^\tau, a_h^\tau) \right\|_{\hat{\Lambda}_h} \\ & \leq \frac{2H}{\sqrt{\kappa K}} \cdot \left\| \sum_{\tau=1}^K \phi(s_h^\tau, a_h^\tau) \cdot \left( (\hat{\mathcal{T}}_h \hat{V}_{h+1})(s_h^\tau, a_h^\tau) - (\mathcal{T}_h \hat{V}_{h+1})(s_h^\tau, a_h^\tau) \right) / \hat{\sigma}_h^2(s_h^\tau, a_h^\tau) \right\|_{\hat{\Lambda}_h^{-1}} \\ & \leq \frac{2H}{\sqrt{\kappa K}} \cdot \tilde{O}\left(\frac{H^2 \sqrt{d}/\kappa}{\sqrt{K}}\right) \cdot \sqrt{d} = \tilde{O}\left(\frac{H^3 d/\kappa}{K}\right) \end{aligned}$$

where the first inequality is by Lemma G.6 (with  $\phi' = \phi/\hat{\sigma}_h$  and  $\|\phi/\hat{\sigma}_h\| \leq \|\phi\| \leq 1 := C$ ) and the third inequality uses  $\sqrt{a^\top \cdot A \cdot a} \leq \sqrt{\|a\|_2 \|A\|_2 \|a\|_2} = \|a\|_2 \sqrt{\|A\|_2}$  with  $a$  to be either  $\phi$  or  $w_h$ . Moreover,  $\lambda_{\min}(\tilde{\Lambda}_h^p) \geq \kappa / \max_{h,s,a} \hat{\sigma}_h(s, a)^2 \geq \kappa/H^2$  implies  $\|(\tilde{\Lambda}_h^p)^{-1}\| \leq H^2/\kappa$ .

The second inequality is true by denoting  $x_\tau = \phi(s_h^\tau, a_h^\tau)/\hat{\sigma}_h(s_h^\tau, a_h^\tau)$  and

$$\eta_\tau = \left( (\hat{\mathcal{T}}_h \hat{V}_{h+1})(s_h^\tau, a_h^\tau) - (\mathcal{T}_h \hat{V}_{h+1})(s_h^\tau, a_h^\tau) \right) / \hat{\sigma}_h(s_h^\tau, a_h^\tau)$$

and use Lemma G.10 as the condition for applying Lemma G.2. By collecting those three terms together we have the result.  $\square$

## D.1 PROOF OF THEOREM 3.3

*Proof.* Use Lemma D.1 as the condition for Lemma C.1 and average over initial distribution  $d_1$ , we obtain with probability  $1 - \delta$ ,

$$\begin{aligned} v^* - v^{\hat{\pi}} & \leq \\ & \sum_{h=1}^H \mathbb{E}_{\pi_h} [\phi(s, a)^\top] \left| \hat{\Lambda}_h^{-1} \sum_{\tau=1}^K \frac{\phi(s_h^\tau, a_h^\tau) \cdot (r_h^\tau + \hat{V}_{h+1}(s_{h+1}^\tau) - (\hat{\mathcal{T}}_h \hat{V}_{h+1})(s_h^\tau, a_h^\tau))}{\hat{\sigma}_h^2(s_h^\tau, a_h^\tau)} \right| + \tilde{O}\left(\frac{H^4 d/\kappa}{K}\right) \end{aligned} \quad (21)$$

Denote  $A_h := \sum_{\tau=1}^K \frac{\phi(s_h^\tau, a_h^\tau) \cdot (r_h^\tau + \hat{V}_{h+1}(s_{h+1}^\tau) - (\mathcal{T}_h \hat{V}_{h+1})(s_h^\tau, a_h^\tau))}{\hat{\sigma}_h^2(s_h^\tau, a_h^\tau)}$ , then

$$\begin{aligned} & \mathbb{E}_{\pi_h} [\phi(s, a)^\top] \left| \hat{\Lambda}_h^{-1} \sum_{\tau=1}^K \frac{\phi(s_h^\tau, a_h^\tau) \cdot (r_h^\tau + \hat{V}_{h+1}(s_{h+1}^\tau) - (\hat{\mathcal{T}}_h \hat{V}_{h+1})(s_h^\tau, a_h^\tau))}{\hat{\sigma}_h^2(s_h^\tau, a_h^\tau)} \right| \\ & \leq \mathbb{E}_{\pi_h} [\phi]^\top \cdot \left| \hat{\Lambda}_h^{-1} A_h \right| + \mathbb{E}_{\pi_h} [\phi]^\top \left| \hat{\Lambda}_h^{-1} \sum_{\tau=1}^K \frac{\phi(s_h^\tau, a_h^\tau) \cdot (\mathcal{T}_h \hat{V}_{h+1}(s_h^\tau, a_h^\tau) - \hat{\mathcal{T}}_h \hat{V}_{h+1}(s_h^\tau, a_h^\tau))}{\hat{\sigma}_h^2(s_h^\tau, a_h^\tau)} \right| \end{aligned}$$

<sup>13</sup>Note Here Lemma C.2 still applies even if the  $\Gamma_h$  changes since it works for all  $\hat{V}_h \in [0, H]$  so that  $\|w_h\|_2 \leq 2H\sqrt{d}$  and the truncation (Line 13 in Algorithm 1) guarantees this.

For the second term, it can be bounded similar to term (iii) in Lemma D.1 and for the first term by Cauchy's inequality it is bounded by

$$\|\mathbb{E}_{\pi_h}[\phi]\|_{\hat{\Lambda}_h^{-1}} \cdot \|A_h\|_{\hat{\Lambda}_h^{-1}} \leq \tilde{O}(\sqrt{d}) \|\mathbb{E}_{\pi_h}[\phi]\|_{\hat{\Lambda}_h^{-1}} \leq \tilde{O}(\sqrt{d}) \|\mathbb{E}_{\pi_h}[\phi]\|_{\Lambda_h^{-1}}$$

where the first inequality is identical to the analysis in Section C.2.2 and the second inequality is identical to the analysis in Section C.2.1 with  $\phi$  replaced by  $\mathbb{E}[\phi]$ . Plug this back to equation 21 we finish the proof for the first part. For the second part, converting  $\Lambda_h^{-1}$  to  $\Lambda_h^{*-1}$  is identical to Section C.5. This finishes the proof.  $\square$

## E PROOF OF MINIMAX LOWER BOUND THEOREM 3.5

The proof follows the lower bound proof of Zanette et al. (2021). For completeness, we provide all the details in below.

### E.1 CONSTRUCTION

Similar to the proof of [Zanette et al. (2021), Theorem 2], we construct a family of MDPs, each parameterized by a Boolean vector  $u = (u_1, \dots, u_H)$  with each  $u_h \in \{-1, +1\}^{d-2}$  for  $h \in [H]$ . The MDPs share the same transition kernel and are only different in the reward observations.

**State space:** At each time step  $h$ , there are two states  $\mathcal{S} = \{+1, -1\}$ .

**Action space:** The action space  $\mathcal{A} = \{-1, 0, +1\}^{d-2}$ .

**Feature map:** The feature map  $\phi : \mathcal{S} \times \mathcal{A} \mapsto \mathbb{R}^d$  is given by

$$\phi(+1, a) = \begin{pmatrix} \frac{a}{\sqrt{2d}} \\ \frac{1}{\sqrt{2}} \\ 0 \end{pmatrix} \in \mathbb{R}^d, \quad \phi(-1, a) = \begin{pmatrix} \frac{a}{\sqrt{2d}} \\ 0 \\ \frac{1}{\sqrt{2}} \end{pmatrix} \in \mathbb{R}^d.$$

The construction ensures the condition  $\|\phi(s, a)\|_2 \leq 1$  for any  $(s, a) \in \mathcal{S} \times \mathcal{A}$ .

**Transition kernel:** The transition probability  $P_h(s' | s, a)$  is independent of action  $a$ . In other words, the Markov decision process reduces to a homogeneous Markov chain with transition matrix

$$\mathbf{P} = \begin{pmatrix} \frac{1}{2} & \frac{1}{2} \\ \frac{1}{2} & \frac{1}{2} \end{pmatrix} \in \mathbb{R}^2.$$

By letting

$$\nu_h(+1) = \nu_h(-1) = \begin{pmatrix} \mathbf{0}_{d-2} \\ \frac{1}{\sqrt{2}} \\ \frac{1}{\sqrt{2}} \end{pmatrix} \in \mathbb{R}^d,$$

we have  $P_h(s' | s, a) = \langle \phi(s, a), \nu_h(s') \rangle$  to be a valid probability transition.

**Reward observations:** For any MDP  $M_u$ , at each times step  $h$ , the reward follows a Gaussian distribution with

$$R_{u,h}(s, a) \sim \mathcal{N}\left(\frac{s}{\sqrt{6}} + \frac{\delta}{\sqrt{2d}} \langle a, u_h \rangle, 1\right),$$

where  $\delta \in [0, \frac{1}{\sqrt{3d}}]$  determines to what extent the MDP models are different from each other. The mean reward function satisfies  $r_{u,h}(s, a) = \langle \phi(s, a), \theta_{u,h} \rangle$  with

$$\theta_{u,h} = \begin{pmatrix} \delta u_h \\ \frac{1}{\sqrt{3}} \\ -\frac{1}{\sqrt{3}} \end{pmatrix} \in \mathbb{R}^d.$$

**Offline data collection Scheme:** The dataset  $\mathcal{D} = \{(s_h^\tau, a_h^\tau, r_h^\tau, s_{h+1}^\tau)\}_{\tau \in [K]}^{h \in [H]}$  consist of  $K$  i.i.d. trajectories. All the trajectories initiate from uniform distribution. We take a behavior policy  $\mu(\cdot | s)$  that is independent of state  $s$ . Let  $\{e_1, e_2, \dots, e_{d-2}\}$  be the canonical bases of  $\mathbb{R}^{d-2}$  and  $\mathbf{0}_{d-2} \in \mathbb{R}^{d-2}$  be the zero vector. The behavior policy  $\mu$  is set as

$$\mu(e_j | s) = \frac{1}{d} \quad \text{for any } j \in [d-2] \quad \text{and} \quad \mu(\mathbf{0}_{d-2} | s) = \frac{2}{d}.$$

## E.2 OVERVIEW OF PROOF

The proof of the theorem is based on Assouad’s method, where we first reduce the problem to binary hypothesis tests (Lemmas E.1 and E.2) and then connect the testing error to the uncertainty quantity in the upper bound (Lemma E.3).

**Lemma E.1** (Reduction to testing). *There exists a universal constant  $c_1 > 0$  such that*

$$\inf_{\hat{\pi}} \max_{u \in \mathcal{U}} \mathbb{E}_u [V_u^* - V_u^{\hat{\pi}}] \geq c_1 \delta \sqrt{d} H \min_{u, u' \in \mathcal{U}: D_H(u'; u)=1} \inf_{\psi} [\mathbb{P}_u(\psi \neq u) + \mathbb{P}_{u'}(\psi \neq u')], \quad (22)$$

where  $\hat{\pi}$  denotes the output of any algorithm that maps from observations to an estimated policy.  $\psi$  is any test function for parameter  $u$  and  $D_H$  is the hamming distance.

**Lemma E.2.** *There exists a universal constant  $c_2 > 0$  such that when taking  $\delta := \frac{c_2 d}{\sqrt{K}}$ , we have*

$$\min_{u, u' \in \mathcal{U}: D_H(u'; u)=1} \inf_{\psi} [\mathbb{P}_u(\psi \neq u) + \mathbb{P}_{u'}(\psi \neq u')] \geq \frac{1}{2}. \quad (23)$$

When  $K \gtrsim d^3$ ,  $\delta := \frac{c_2 d}{\sqrt{K}}$  ensures that  $\delta \leq 1/\sqrt{3d}$ . Combining Lemmas E.1 and E.2 yields a lower bound

$$\inf_{\hat{\pi}} \max_{u \in \mathcal{U}} \mathbb{E}_u [V_u^* - V_u^{\hat{\pi}}] \geq c \frac{d\sqrt{d}H}{\sqrt{K}}, \quad (24)$$

where  $c > 0$  is a universal constant. We then use the following Lemma E.3 to connect the above lower bound to the uncertainty term  $\sqrt{d} \cdot \sum_{h=1}^H \sqrt{\mathbb{E}_{\pi^*}[\phi]^\top (\Lambda_h^*)^{-1} \mathbb{E}_{\pi^*}[\phi]}$  for the chosen linear MDP instances class  $\mathcal{M}$ .

**Lemma E.3.** *There exists a universal constant  $c_3 > 0$  such that for all  $M \in \mathcal{M}$ ,*

$$\sum_{h=1}^H \sqrt{\mathbb{E}_{\pi^*}[\phi]^\top (\Lambda_h^*)^{-1} \mathbb{E}_{\pi^*}[\phi]} \leq c_3 \frac{dH}{\sqrt{K}}. \quad (25)$$

Plugging inequality equation E.3 into the bound equation 24, we obtain the minimax lower bound equation 5 in the statement of theorem.

## E.3 REDUCTION TO TESTING VIA ASSOUD’S METHOD

*Proof of Lemma E.1.* For any index vector  $u = (u_1, \dots, u_H) \in \mathcal{U} = \{-1, +1\}^{(d-2) \times H}$ , the optimal policy for MDP instance  $M_u$  is simply

$$\pi_h^*(\cdot) = u_h \quad \text{for } h \in [H].$$

Similar to the proof of Lemma 9 in Zanette et al. (2021), we can show that the value suboptimality of policy  $\pi$  on MDP  $M_u$  is given by

$$V_u^* - V_u^\pi = \frac{\delta}{\sqrt{2d}} \sum_{h=1}^H \|u_h - \mathbb{E}_\pi[a_h]\|_1.$$

Define  $u^\pi = (u_1^\pi, \dots, u_H^\pi)$  with  $u_h^\pi := \text{sign}(\mathbb{E}_\pi[a_h])$ , then the  $\ell_1$ -norm is lower bounded as

$$\|u_h - \mathbb{E}_\pi[a_h]\|_1 \geq D_H(u_h^\pi; u_h),$$

where  $D_H(\cdot; \cdot)$  denotes the Hamming distance. It follows that

$$V_u^* - V_u^\pi \geq \frac{\delta}{\sqrt{2d}} D_H(u^\pi; u). \quad (26)$$

We then apply Assouad’s method (Lemma 2.12 in Sampson & Guttorm (1992)) and obtain that

$$\inf_{\hat{u} \in \mathcal{U}} \max_{u \in \mathcal{U}} \mathbb{E}_u [D_H(\hat{u}; u)] \geq \frac{(d-2)H}{2} \min_{u, u' \in \mathcal{U}: D_H(u'; u)=1} \inf_{\psi} [\mathbb{P}_u(\psi \neq u) + \mathbb{P}_{u'}(\psi \neq u')], \quad (27)$$

where  $\psi$  is any test functions mapping from observations to  $\{u, u'\}$ . Combining inequalities equation 26 and equation 27, we finish the proof.  $\square$

#### E.4 LOWER BOUND ON THE TESTING ERROR

*Proof of Lemma E.2.* The proof of Lemma E.2 is similar to that of Lemma 10 in Zanette et al. (2021). We first apply Theorem 2.12 in Sampson & Guttrop (1992) to lower bound the testing error using KullbackLeibler divergence and obtain

$$\min_{u, u' \in \mathcal{U}: D_H(u'; u) = 1} \inf_{\psi} [\mathbb{P}_u(\psi \neq u) + \mathbb{P}_{u'}(\psi \neq u')] \geq 1 - \left( \frac{1}{2} \max_{u, u' \in \mathcal{U}: D_H(u'; u) = 1} D_{\text{KL}}(\mathcal{Q}_u \| \mathcal{Q}_{u'}) \right)^{1/2}. \quad (28)$$

It only remains to estimate  $D_{\text{KL}}(\mathcal{Q}_u \| \mathcal{Q}_{u'})$ .

The probability density  $\mathcal{Q}_u$  takes the form

$$\mathcal{Q}_u(\mathcal{D}) = \prod_{k=1}^K \xi_1(s_1^k) \prod_{h=1}^H \mu(a_h^k | s_h^k) [R_{u,h}(s_h^k, a_h^k)](r_h^k) \mathbb{P}_h(s_{h+1}^k | s_h^k, a_h^k)$$

where  $\xi_1 = [\frac{1}{2}, \frac{1}{2}]$  is the initial distribution. It follows that

$$\begin{aligned} D_{\text{KL}}(\mathcal{Q}_u \| \mathcal{Q}_{u'}) &= \mathbb{E}_u [\log(\mathcal{Q}_u / \mathcal{Q}_{u'})] \\ &= K \cdot \sum_{h=1}^H \mathbb{E}_u \left[ \log \left( [R_{u,h}(s_h^1, a_h^1)](r_h^1) / [R_{u',h}(s_h^1, a_h^1)](r_h^1) \right) \right] \\ &= \frac{K}{d} \sum_{j=1}^{d-2} D_{\text{KL}} \left( \mathcal{N} \left( \frac{\delta}{\sqrt{2d}} \langle e_j, u_h \rangle, 1 \right) \parallel \mathcal{N} \left( \frac{\delta}{\sqrt{2d}} \langle e_j, u'_h \rangle, 1 \right) \right). \end{aligned}$$

If we take  $\delta = \frac{c_2 d}{\sqrt{K}}$ , then inequality equation 28 ensures inequality equation 23, as claimed in the statement of the lemma.  $\square$

#### E.5 CONNECTION TO THE UNCERTAINTY TERM

*Proof of Lemma E.3.* We first calculate the explicit form of the inverse of variance-rescaled covariance matrix  $\Lambda_h^{*,p}$ . For each time step  $h \in [H]$ , the value function  $V_{u,h+1}^*$  takes the form

$$V_{u,h+1}^* = \mathbb{E}_{\pi^*} r_{u,h+1} + (\mathbb{P}_{h+1}^* V_{u,h+2}^*).$$

Since  $(\mathbb{P}_{h+1} V_{u,h+2}^*)(+1) = (\mathbb{P}_{h+1} V_{u,h+2}^*)(-1)$  and  $r_{u,h+1}(+1, a) - r_{u,h+1}(-1, a) = 2/\sqrt{6}$ , we have

$$\text{Var}_{P_h}(V_{u,h+1}^*)(+1, a) = \text{Var}_{P_h}(\mathbb{E}_{\pi^*} r_{u,h+1})(+1, a) = \frac{1}{6}.$$

Similarly,

$$\text{Var}_{P_h}(V_{u,h+1}^*)(-1, a) = \text{Var}_{P_h}(V_{u,h+1}^*)(+1, a) = \frac{1}{6}.$$

By routine calculation, we find that the population-level rescaled covariance matrix takes the form

$$\Lambda_h^{*,p} = \frac{3K}{2} \begin{pmatrix} \frac{2}{d^2} \mathbf{I}_{d-2} & \frac{1}{d\sqrt{d}} \mathbf{1}_{(d-2) \times 2} \\ \frac{1}{d\sqrt{d}} \mathbf{1}_{2 \times (d-2)} & \mathbf{I}_2 \end{pmatrix} \in \mathbb{R}^{d \times d}$$

for any  $h \in [H]$ . Applying Gaussian elimination on  $\Lambda_h^{*,p}$ , we have

$$(\Lambda_h^{*,p})^{-1} = \frac{2}{3K} \begin{pmatrix} \frac{d^2}{2} \{ \mathbf{I}_{d-2} + \frac{1}{d-2} \mathbf{1}_{(d-2) \times (d-2)} \} & -\frac{d\sqrt{d}}{2(d-2)} \mathbf{1}_{(d-2) \times 2} \\ -\frac{d\sqrt{d}}{2(d-2)} \mathbf{1}_{2 \times (d-2)} & \frac{1}{d-2} \begin{pmatrix} d-1 & 1 \\ 1 & d-1 \end{pmatrix} \end{pmatrix}.$$

For each time step  $h \in [H]$ , we have (by Jensen's inequality)

$$\sqrt{\mathbb{E}_{\pi^*}[\phi]^\top (\Lambda_h^*)^{-1} \mathbb{E}_{\pi^*}[\phi]} \leq \frac{1}{2} \|\phi(+1, u_h)\|_{(\Lambda_h^{*,p})^{-1}} + \frac{1}{2} \|\phi(-1, u_h)\|_{(\Lambda_h^{*,p})^{-1}}.$$

Recall that by our construction,

$$\phi(+1, u_h) = \begin{pmatrix} \frac{u_h}{\sqrt{2d}} \\ \frac{1}{\sqrt{2}} \\ 0 \end{pmatrix} \in \mathbb{R}^d, \quad \phi(-1, u_h) = \begin{pmatrix} \frac{u_h}{\sqrt{2d}} \\ 0 \\ \frac{1}{\sqrt{2}} \end{pmatrix} \in \mathbb{R}^d.$$

It follows that

$$\begin{aligned} \|\phi(+1, u_h)\|_{(\Lambda_h^{*,p})^{-1}}^2 &= \|\phi(-1, u_h)\|_{(\Lambda_h^{*,p})^{-1}}^2 \\ &= \frac{2}{3K} \left\{ \frac{d}{4} u_h^\top \{ \mathbf{I}_{d-2} + \frac{1}{d-2} \mathbf{1}_{(d-2) \times (d-2)} \} u_h - \frac{d}{2(d-2)} \mathbf{1}_{d-2}^\top u_h + \frac{d-1}{2(d-2)} \right\} \\ &= \frac{2}{3K} \left\{ \frac{d^2}{4} + \frac{d}{4(d-2)} (1 - \mathbf{1}_{d-2}^\top u_h)^2 + \frac{1}{4} \right\} \\ &\leq \frac{2}{3K} \left\{ \frac{d^2}{4} + \frac{d(d-1)^2}{4(d-2)} + \frac{1}{4} \right\} = \frac{2}{3K} \left\{ \frac{d^2}{2} + \frac{d-1}{2(d-2)} \right\} \lesssim d^2/K. \end{aligned}$$

Therefore,

$$\sqrt{\mathbb{E}_{\pi^*}[\phi]^\top (\Lambda_h^*)^{-1} \mathbb{E}_{\pi^*}[\phi]} \lesssim d/\sqrt{K}.$$

Taking the summation over  $h \in [H]$ , we obtain the bound equation 25 as claimed in the lemma statement.  $\square$

## F SOME MISSING DERIVATION OF THE DISCUSSIONS IN 3.3

### F.1 DERIVATION OF EQUATION 4

When reducing Theorem 3.2,3.3 to the tabular case, set  $\phi(s, a) = \mathbf{1}_{s,a}$ ,  $d = SA$ ,  $\lambda = 0$ , and recall by Assumption 3.4 (let's assume  $\pi^*$  is a deterministic policy as it always exists in tabular MDP)

$C^* := \sup_{h,s,a} d_h^{\pi^*}(s, a) / d_h^\mu(s, a)$ , then for Theorem 3.2

$$\begin{aligned}
& \sqrt{d} \cdot \sum_{h=1}^H \mathbb{E}_{\pi^*} \left[ \sqrt{\phi(\cdot, \cdot)^\top \Lambda_h^{*-1} \phi(\cdot, \cdot)} \right] = \sqrt{d} \cdot \sum_{h=1}^H \sum_{s,a} d_h^{\pi^*}(s, a) \sqrt{\mathbf{1}_{s,a}^\top \Lambda_h^{*-1} \mathbf{1}_{s,a}} \\
& = \sqrt{SA} \cdot \sum_{h=1}^H \sum_{s,a} d_h^{\pi^*}(s, a) \sqrt{\mathbf{1}_{s,a}^\top \text{diag} \left\{ \frac{\text{Var}_{P_{\cdot,\cdot}}(V_{h+1}^*)}{n_{h,\cdot,\cdot}} \right\} \mathbf{1}_{s,a}} \\
& = \sqrt{SA} \cdot \sum_{h=1}^H \sum_{s,a} d_h^{\pi^*}(s, a) \sqrt{\frac{\text{Var}_{P_{s,a}}(V_{h+1}^*)}{n_{h,s,a}}} \quad n_{h,s,a} := \sum_{\tau=1}^K \mathbf{1}[s_h^\tau, a_h^\tau = s, a] \\
& \lesssim \sqrt{SA} \cdot \sum_{h=1}^H \sum_{s,a} d_h^{\pi^*}(s, a) \sqrt{\frac{\text{Var}_{P_{s,a}}(V_{h+1}^*)}{K \cdot d_h^\mu(s, a)}} \\
& \leq \sqrt{SAC^*/K} \cdot \sum_{h=1}^H \sum_{s,a} \sqrt{d_h^{\pi^*}(s, a) \text{Var}_{P_{s,a}}(V_{h+1}^*)} \\
& = \sqrt{SAC^*/K} \cdot \sum_{h=1}^H \sum_s \sqrt{d_h^{\pi^*}(s, \pi^*(s)) \text{Var}_{P_{s,\pi^*(s)}}(V_{h+1}^*)} \\
& \leq \sqrt{SAC^*/K} \cdot \sum_{h=1}^H \sqrt{S \cdot \sum_s d_h^{\pi^*}(s, \pi^*(s)) \text{Var}_{P_{s,\pi^*(s)}}(V_{h+1}^*)} \\
& \leq \sqrt{S^2 AC^*/K} \cdot \sqrt{H \sum_{h=1}^H \sum_s d_h^{\pi^*}(s, \pi^*(s)) \text{Var}_{P_{s,\pi^*(s)}}(V_{h+1}^*)} \\
& = \sqrt{S^2 AC^*/K} \cdot \sqrt{H \cdot \sum_{h=1}^H \mathbb{E}_{\pi_h^*} [\text{Var}_{P_{(\cdot,\cdot)}}(V_{h+1}^*)]} \leq \sqrt{H^3 S^2 AC^*/K}
\end{aligned}$$

where the first inequality is by Chernoff bound and the last one is by Lemma 3.4. of [Yin & Wang \(2020\)](#) (Law of total variances). The rest of them are from Cauchy's inequality. Similarly, for Theorem 3.3, we also have

$$\begin{aligned}
& \sqrt{d} \cdot \sum_{h=1}^H \sqrt{\mathbb{E}_{\pi^*} [\phi]^\top \Lambda_h^{*-1} \mathbb{E}_{\pi^*} [\phi]} = \sqrt{d} \cdot \sum_{h=1}^H \sqrt{\text{Vec}\{d^{\pi^*}\} \Lambda_h^{*-1} \text{Vec}\{d^{\pi^*}\}} \\
& = \sqrt{d} \cdot \sum_{h=1}^H \sqrt{\text{Vec}\{d^{\pi^*}\} \text{diag} \left\{ \frac{\text{Var}_{P_{\cdot,\cdot}}(V_{h+1}^*)}{n_{h,\cdot,\cdot}} \right\} \text{Vec}\{d^{\pi^*}\}} \\
& = \sqrt{SA} \cdot \sum_{h=1}^H \sqrt{\sum_{s,a} d_h^{\pi^*}(s, a)^2 \frac{\text{Var}_{P_{s,a}}(V_{h+1}^*)}{n_{h,s,a}}} \\
& \lesssim \sqrt{SA} \cdot \sum_{h=1}^H \sqrt{\sum_{s,a} d_h^{\pi^*}(s, a)^2 \frac{\text{Var}_{P_{s,a}}(V_{h+1}^*)}{K \cdot d_h^\mu(s, a)}} \\
& \leq \sqrt{SAC^*/K} \cdot \sum_{h=1}^H \sqrt{\sum_{s,a} d_h^{\pi^*}(s, a) \text{Var}_{P_{s,a}}(V_{h+1}^*)} \\
& = \sqrt{SAC^*/K} \cdot \sum_{h=1}^H \sqrt{\sum_s d_h^{\pi^*}(s, \pi^*(s)) \text{Var}_{P_{s,\pi^*(s)}}(V_{h+1}^*)} \\
& \leq \sqrt{SAC^*/K} \cdot \sqrt{H \cdot \sum_{h=1}^H \mathbb{E}_{\pi_h^*} [\text{Var}_{P_{(\cdot,\cdot)}}(V_{h+1}^*)]} \leq \sqrt{H^3 SAC^*/K}.
\end{aligned}$$

## G AUXILIARY LEMMAS

**Lemma G.1** (Matrix McDiarmid inequality / Matrix Chernoff bound (Tropp, 2012)). *Let  $z_k, k = 1, \dots, K$  be independent random vectors in  $\mathbb{R}^d$ , and let  $H$  be a mapping that maps  $K$  vectors to a  $d \times d$  symmetric matrix. Assume there exists a sequence of fixed symmetric matrices  $\{A_k\}_{k \in [K]}$  such that for  $z_k, z'_k$  ranges over all possible values for each  $k \in [K]$ , it holds*

$$(H(z_1, \dots, z_k, \dots, z_K) - H(z_1, \dots, z'_k, \dots, z_K))^2 \preceq A_k^2.$$

*Define  $\sigma^2 := \|\sum_k A_k^2\|$ . Then for any  $t > 0$ ,*

$$\mathbb{P}\{\|H(z_1, \dots, z_K) - \mathbb{E}H(z_1, \dots, z_K)\| \geq t\} \leq d \cdot \exp\left(\frac{-t^2}{8\sigma^2}\right)$$

**Lemma G.2** (Hoeffding inequality for self-normalized martingales (Abbasi-Yadkori et al., 2011)). *Let  $\{\eta_t\}_{t=1}^\infty$  be a real-valued stochastic process. Let  $\{\mathcal{F}_t\}_{t=0}^\infty$  be a filtration, such that  $\eta_t$  is  $\mathcal{F}_t$ -measurable. Assume  $\eta_t$  also satisfies  $\eta_t$  given  $\mathcal{F}_{t-1}$  is zero-mean and  $R$ -subgaussian, i.e.*

$$\forall \lambda \in \mathbb{R}, \quad \mathbb{E}[e^{\lambda \eta_t} \mid \mathcal{F}_{t-1}] \leq e^{\lambda^2 R^2 / 2}$$

*Let  $\{x_t\}_{t=1}^\infty$  be an  $\mathbb{R}^d$ -valued stochastic process where  $x_t$  is  $\mathcal{F}_{t-1}$  measurable and  $\|x_t\| \leq L$ . Let  $\Lambda_t = \lambda I_d + \sum_{s=1}^t x_s x_s^\top$ . Then for any  $\delta > 0$ , with probability  $1 - \delta$ , for all  $t > 0$ ,*

$$\left\| \sum_{s=1}^t x_s \eta_s \right\|_{\Lambda_t^{-1}}^2 \leq 8R^2 \cdot \frac{d}{2} \log\left(\frac{\lambda + tL}{\lambda\delta}\right).$$

**Lemma G.3** (Bernstein inequality for self-normalized martingales (Zhou et al., 2021)). *Let  $\{\eta_t\}_{t=1}^\infty$  be a real-valued stochastic process. Let  $\{\mathcal{F}_t\}_{t=0}^\infty$  be a filtration, such that  $\eta_t$  is  $\mathcal{F}_t$ -measurable. Assume  $\eta_t$  also satisfies*

$$|\eta_t| \leq R, \quad \mathbb{E}[\eta_t \mid \mathcal{F}_{t-1}] = 0, \quad \mathbb{E}[\eta_t^2 \mid \mathcal{F}_{t-1}] \leq \sigma^2.$$

*Let  $\{x_t\}_{t=1}^\infty$  be an  $\mathbb{R}^d$ -valued stochastic process where  $x_t$  is  $\mathcal{F}_{t-1}$  measurable and  $\|x_t\| \leq L$ . Let  $\Lambda_t = \lambda I_d + \sum_{s=1}^t x_s x_s^\top$ . Then for any  $\delta > 0$ , with probability  $1 - \delta$ , for all  $t > 0$ ,*

$$\left\| \sum_{s=1}^t \mathbf{x}_s \eta_s \right\|_{\Lambda_t^{-1}} \leq 8\sigma \sqrt{d \log\left(1 + \frac{tL^2}{\lambda d}\right) \cdot \log\left(\frac{4t^2}{\delta}\right)} + 4R \log\left(\frac{4t^2}{\delta}\right)$$

**Lemma G.4** (Converting the variance under the matrix norm). *Let  $\Lambda_1$  and  $\Lambda_2 \in \mathbb{R}^{d \times d}$  are two positive semi-definite matrices. Then:*

$$\|\Lambda_1^{-1}\| \leq \|\Lambda_2^{-1}\| + \|\Lambda_1^{-1}\| \cdot \|\Lambda_2^{-1}\| \cdot \|\Lambda_1 - \Lambda_2\|$$

*and*

$$\|\phi\|_{\Lambda_1^{-1}} \leq \left[1 + \sqrt{\|\Lambda_2^{-1}\| \|\Lambda_2\| \cdot \|\Lambda_1^{-1}\| \cdot \|\Lambda_1 - \Lambda_2\|}\right] \cdot \|\phi\|_{\Lambda_2^{-1}}.$$

*for all  $\phi \in \mathbb{R}^d$ .*

*Proof.* For the first part, note

$$\|\Lambda_1^{-1}\| \leq \|\Lambda_2^{-1}\| + \|\Lambda_1^{-1} - \Lambda_2^{-1}\| \leq \|\Lambda_2^{-1}\| + \|\Lambda_2^{-1}\| \|\Lambda_1 - \Lambda_2\| \|\Lambda_1^{-1}\|$$

For the second one,

$$\begin{aligned} \|\phi\|_{\Lambda_1^{-1}} &= \sqrt{\phi^\top \Lambda_1^{-1} \phi} = \sqrt{\phi^\top (\Lambda_1^{-1} - \Lambda_2^{-1}) \phi + \phi^\top \Lambda_2^{-1} \phi} \\ &= \sqrt{\phi^\top \Lambda_2^{-1/2} (\Lambda_2^{1/2} \Lambda_1^{-1} \Lambda_2^{1/2} - I + I) \Lambda_2^{-1/2} \phi} \leq \sqrt{\|\phi\|_{\Lambda_2^{-1}} \cdot \left(1 + \left\| \Lambda_2^{1/2} \Lambda_1^{-1} \Lambda_2^{1/2} - I \right\| \right) \|\phi\|_{\Lambda_2^{-1}}} \\ &\leq \left(1 + \left\| \Lambda_2^{1/2} \Lambda_1^{-1} \Lambda_2^{1/2} - I \right\|^{1/2}\right) \cdot \|\phi\|_{\Lambda_2^{-1}} = \left(1 + \left\| \Lambda_2^{1/2} \Lambda_1^{-1} (\Lambda_2 - \Lambda_1) \Lambda_2^{-1} \Lambda_2^{1/2} \right\|^{1/2}\right) \cdot \|\phi\|_{\Lambda_2^{-1}} \\ &\leq \left(1 + \sqrt{\|\Lambda_2\| \|\Lambda_1^{-1}\| \|\Lambda_2^{-1}\| \|\Lambda_1 - \Lambda_2\|}\right) \cdot \|\phi\|_{\Lambda_2^{-1}} \end{aligned}$$

□

**Lemma G.5** (Lemma H.4 of [Min et al. \(2021\)](#)). *let  $\phi : \mathcal{S} \times \mathcal{A} \rightarrow \mathbb{R}^d$  satisfies  $\|\phi(s, a)\| \leq C$  for all  $s, a \in \mathcal{S} \times \mathcal{A}$ . For any  $K > 0, \lambda > 0$ , define  $\bar{G}_K = \sum_{k=1}^K \phi(s_k, a_k) \phi(s_k, a_k)^\top + \lambda I_d$  where  $(s_k, a_k)$ 's are i.i.d samples from some distribution  $\nu$ . Then with probability  $1 - \delta$ ,*

$$\left\| \frac{\bar{G}_K}{K} - \mathbb{E}_\nu \left[ \frac{\bar{G}_K}{K} \right] \right\| \leq \frac{4\sqrt{2}C^2}{\sqrt{K}} \left( \log \frac{2d}{\delta} \right)^{1/2}.$$

*Proof of Lemma G.5.* For completeness, we provide the proof of Lemma G.5. Let  $x_k = \phi(s_k, a_k)$ . Denote  $\tilde{\Sigma}_h$  as the matrix obtained by replacing the  $k$ -th vector  $x_k$  in  $\hat{\Sigma}_h$  by  $\tilde{x}_k$  and leaving the rest  $K-1$  vectors unchanged. Then

$$\left( \frac{\hat{\Sigma}_h}{K} - \frac{\tilde{\Sigma}_h}{K} \right)^2 = \left( \frac{x_k x_k^\top - \tilde{x}_k \tilde{x}_k^\top}{K} \right) \preceq \frac{1}{K^2} (2x_k x_k^\top x_k x_k^\top + 2\tilde{x}_k \tilde{x}_k^\top \tilde{x}_k \tilde{x}_k^\top) \preceq \frac{4C^4}{K^2} I_d := A_k^2.$$

Notice that  $\left\| \sum_k^K A_k^2 \right\| = \frac{4C^4}{K}$ , by Lemma G.1 we have the result.  $\square$

**Lemma G.6** (Lemma H.5. of [Min et al. \(2021\)](#)). *Let  $\phi : \mathcal{S} \times \mathcal{A} \rightarrow \mathbb{R}^d$  be a bounded function s.t.  $\|\phi\|_2 \leq C$ . Define  $\bar{G}_K = \sum_{k=1}^K \phi(s_k, a_k) \phi(s_k, a_k)^\top + \lambda I_d$  where  $(s_k, a_k)$ 's are i.i.d samples from some distribution  $\nu$ . Let  $G = \mathbb{E}_\nu[\phi(s, a) \phi(s, a)^\top]$ . Then for any  $\delta \in (0, 1)$ , if  $K$  satisfies*

$$K \geq \max \left\{ 512C^4 \|\mathbf{G}^{-1}\|^2 \log \left( \frac{2d}{\delta} \right), 4\lambda \|\mathbf{G}^{-1}\| \right\}.$$

*Then with probability at least  $1 - \delta$ , it holds simultaneously for all  $u \in \mathbb{R}^d$  that*

$$\|u\|_{\bar{G}_K^{-1}} \leq \frac{2}{\sqrt{K}} \|u\|_{G^{-1}}.$$

**Lemma G.7** (Extended Value Difference (Section B.1 in [Cai et al. \(2020\)](#))). *Let  $\pi = \{\pi_h\}_{h=1}^H$  and  $\pi' = \{\pi'_h\}_{h=1}^H$  be two arbitrary policies and let  $\{\hat{Q}_h\}_{h=1}^H$  be any given  $Q$ -functions. Then define  $\hat{V}_h(s) := \langle \hat{Q}_h(s, \cdot), \pi_h(\cdot | s) \rangle$  for all  $s \in \mathcal{S}$ . Then for all  $s \in \mathcal{S}$ ,*

$$\begin{aligned} \hat{V}_1(s) - V_1^{\pi'}(s) &= \sum_{h=1}^H \mathbb{E}_{\pi'} \left[ \langle \hat{Q}_h(s_h, \cdot), \pi_h(\cdot | s_h) - \pi'_h(\cdot | s_h) \rangle \mid s_1 = s \right] \\ &\quad + \sum_{h=1}^H \mathbb{E}_{\pi'} \left[ \hat{Q}_h(s_h, a_h) - (\mathcal{T}_h \hat{V}_{h+1})(s_h, a_h) \mid s_1 = s \right] \end{aligned} \quad (29)$$

where  $(\mathcal{T}_h V)(\cdot, \cdot) := r_h(\cdot, \cdot) + (P_h V)(\cdot, \cdot)$  for any  $V \in \mathbb{R}^{\mathcal{S}}$ .

*Proof.* Denote  $\xi_h = \hat{Q}_h - \mathcal{T}_h \hat{V}_{h+1}$ . For any  $h \in [H]$ , we have

$$\begin{aligned} \hat{V}_h - V_h^{\pi'} &= \langle \hat{Q}_h, \pi_h \rangle - \langle Q_h^{\pi'}, \pi'_h \rangle \\ &= \langle \hat{Q}_h, \pi_h - \pi'_h \rangle + \langle \hat{Q}_h - Q_h^{\pi'}, \pi'_h \rangle \\ &= \langle \hat{Q}_h, \pi_h - \pi'_h \rangle + \langle P_h(\hat{V}_{h+1} - V_{h+1}^{\pi'}) + \xi_h, \pi'_h \rangle \\ &= \langle \hat{Q}_h, \pi_h - \pi'_h \rangle + \langle P_h(\hat{V}_{h+1} - V_{h+1}^{\pi'}), \pi'_h \rangle + \langle \xi_h, \pi'_h \rangle \end{aligned}$$

recursively apply the above for  $\hat{V}_{h+1} - V_{h+1}^{\pi'}$  and use the  $\mathbb{E}_{\pi'}$  notation (instead of the inner product of  $P_h, \pi'_h$ ) we can finish the prove of this lemma.  $\square$

**Lemma G.8.** *Let  $\hat{\pi} = \{\hat{\pi}_h\}_{h=1}^H$  and  $\hat{Q}_h(\cdot, \cdot)$  be the arbitrary policy and  $Q$ -function and also  $\hat{V}_h(s) = \langle \hat{Q}_h(s, \cdot), \hat{\pi}_h(\cdot | s) \rangle \forall s \in \mathcal{S}$ . and  $\zeta_h(s, a) := (\mathcal{T}_h \hat{V}_{h+1})(s, a) - \hat{Q}_h(s, a)$  (element-wisely)*

to be the Bellman update error. Then for any arbitrary  $\pi$ , we have

$$\begin{aligned} V_1^\pi(s) - V_1^{\hat{\pi}}(s) &= \sum_{h=1}^H \mathbb{E}_\pi [\zeta_h(s_h, a_h) \mid s_1 = s] - \sum_{h=1}^H \mathbb{E}_{\hat{\pi}} [\zeta_h(s_h, a_h) \mid s_1 = s] \\ &\quad + \sum_{h=1}^H \mathbb{E}_\pi [\langle \hat{Q}_h(s_h, \cdot), \pi_h(\cdot \mid s_h) - \hat{\pi}_h(\cdot \mid s_h) \rangle \mid s_1 = s] \end{aligned}$$

where the expectation are taken over  $s_h, a_h$ .

*Proof.* Note the gap can be rewritten as

$$V_1^\pi(s) - V_1^{\hat{\pi}}(s) = V_1^\pi(s) - \hat{V}_1(s) + \hat{V}_1(s) - V_1^{\hat{\pi}}(s).$$

By Lemma G.7 with  $\pi = \hat{\pi}, \pi' = \pi$ , we directly have

$$V_1^\pi(s) - \hat{V}_1(s) = \sum_{h=1}^H \mathbb{E}_\pi [\zeta_h(s_h, a_h) \mid s_1 = s] + \sum_{h=1}^H \mathbb{E}_\pi [\langle \hat{Q}_h(s_h, \cdot), \pi_h(\cdot \mid s_h) - \hat{\pi}_h(\cdot \mid s_h) \rangle \mid s_1 = s] \quad (30)$$

Next apply Lemma G.7 again with  $\pi = \pi' = \hat{\pi}$ , we directly have

$$\hat{V}_1(s) - V_1^{\hat{\pi}}(s) = - \sum_{h=1}^H \mathbb{E}_{\hat{\pi}} [\zeta_h(s_h, a_h) \mid s_1 = s]. \quad (31)$$

Combine the above two results we prove the stated result.  $\square$

**Lemma G.9.** For a linear MDP, for any  $0 \leq V(\cdot) \leq H$ , then there exists a  $w_h \in \mathbb{R}^d$  s.t.  $\mathcal{T}_h V = \langle \phi, w_h \rangle$  and  $\|w_h\|_2 \leq 2H\sqrt{d}$  for all  $h \in [H]$ . Here  $\mathcal{T}_h(V)(s, a) = r_h(x, a) + (P_h V)(s, a)$ . Similarly, for any  $\pi$ , there exists  $w_h^\pi \in \mathbb{R}^d$ , such that  $Q_h^\pi = \langle \phi, w_h^\pi \rangle$  with  $\|w_h^\pi\|_2 \leq 2(H - h + 1)\sqrt{d}$ .

*Proof.* By definition,

$$\begin{aligned} \mathcal{T}_h V &= r_h + (P_h V) = \langle \phi, \theta_h \rangle + \langle \phi, \int_{\mathcal{S}} V(s) d\nu_h(s) \rangle \\ &\Rightarrow w_h = \theta_h + \int_{\mathcal{S}} V(s) d\nu_h(s), \end{aligned}$$

therefore  $\|w_h\|_2 \leq \|\theta_h\|_2 + H \cdot \|\nu_h(\mathcal{S})\| \leq 1 + H\sqrt{d} \leq 2H\sqrt{d}$ . The proof of the second part is similar by backward induction and the fact  $V_h^\pi \leq H - h + 1$  for any  $\pi$ .  $\square$

**Lemma G.10.** For any pessimistic bonus design  $\Gamma_h$ , suppose  $K > \max\{\mathcal{M}_1, \mathcal{M}_2, \mathcal{M}_3, \mathcal{M}_4\}$ , then with probability  $1 - \delta$ , Algorithm 1 yields

$$\left\| \mathcal{T}_h \hat{V}_{h+1} - \hat{\mathcal{T}}_h \hat{V}_{h+1} \right\|_\infty \leq \tilde{O}\left(\frac{H^2 \sqrt{d/\kappa}}{\sqrt{K}}\right)$$

*Proof of Lemma G.10.* Suppose  $w_h$  is the coefficient corresponding to the  $\mathcal{T}_h \widehat{V}_{h+1}$  (such  $w_h$  exists by Lemma G.9), i.e.  $\mathcal{T}_h \widehat{V}_{h+1} = \phi^\top w_h$ , and recall  $(\widehat{\mathcal{T}}_h \widehat{V}_{h+1})(s, a) = \phi(s, a)^\top \widehat{w}_h$ , then:

$$\begin{aligned}
& \left( \mathcal{T}_h \widehat{V}_{h+1} \right) (s, a) - \left( \widehat{\mathcal{T}}_h \widehat{V}_{h+1} \right) (s, a) = \phi(s, a)^\top (w_h - \widehat{w}_h) \\
&= \phi(s, a)^\top w_h - \phi(s, a)^\top \widehat{\Lambda}_h^{-1} \left( \sum_{\tau=1}^K \phi(s_h^\tau, a_h^\tau) \cdot \left( r_h^\tau + \widehat{V}_{h+1}(s_{h+1}^\tau) \right) / \widehat{\sigma}_h^2(s_h^\tau, a_h^\tau) \right) \\
&= \underbrace{\phi(s, a)^\top w_h - \phi(s, a)^\top \widehat{\Lambda}_h^{-1} \left( \sum_{\tau=1}^K \phi(s_h^\tau, a_h^\tau) \cdot \left( \mathcal{T}_h \widehat{V}_{h+1} \right) (s_h^\tau, a_h^\tau) / \widehat{\sigma}_h^2(s_h^\tau, a_h^\tau) \right)}_{(i)} \\
&\quad + \underbrace{\phi(s, a)^\top \widehat{\Lambda}_h^{-1} \left( \sum_{\tau=1}^K \phi(s_h^\tau, a_h^\tau) \cdot \left( r_h^\tau + \widehat{V}_{h+1}(s_{h+1}^\tau) - \left( \mathcal{T}_h \widehat{V}_{h+1} \right) (s_h^\tau, a_h^\tau) \right) / \widehat{\sigma}_h^2(s_h^\tau, a_h^\tau) \right)}_{(ii)}.
\end{aligned} \tag{32}$$

For term (i), it is bounded by  $\frac{2\lambda H^3 \sqrt{d}/\kappa}{K}$  with probability  $1 - \delta$  by Lemma C.2.

For term (ii), by Cauchy inequality it is bounded by

$$\begin{aligned}
& \left\| \phi(s, a) \right\|_{\widehat{\Lambda}_h^{-1}} \cdot \left\| \sum_{\tau=1}^K \phi(s_h^\tau, a_h^\tau) \cdot \left( r_h^\tau + \widehat{V}_{h+1}(s_{h+1}^\tau) - \left( \mathcal{T}_h \widehat{V}_{h+1} \right) (s_h^\tau, a_h^\tau) \right) / \widehat{\sigma}_h^2(s_h^\tau, a_h^\tau) \right\|_{\widehat{\Lambda}_h^{-1}} \\
&\leq \frac{2H}{\sqrt{\kappa K}} \left\| \sum_{\tau=1}^K \phi(s_h^\tau, a_h^\tau) \cdot \left( r_h^\tau + \widehat{V}_{h+1}(s_{h+1}^\tau) - \left( \mathcal{T}_h \widehat{V}_{h+1} \right) (s_h^\tau, a_h^\tau) \right) / \widehat{\sigma}_h^2(s_h^\tau, a_h^\tau) \right\|_{\widehat{\Lambda}_h^{-1}} \\
&\leq \frac{2H}{\sqrt{\kappa K}} \cdot \tilde{O}(H\sqrt{d}) = \tilde{O}\left(\frac{H^2 \sqrt{d}/\kappa}{\sqrt{K}}\right),
\end{aligned}$$

where the first inequality is by Lemma G.6 (with  $\phi' = \phi/\widehat{\sigma}_h$  and  $\|\phi/\widehat{\sigma}_h\| \leq \|\phi\| \leq 1 := C$ ) and the third inequality uses  $\sqrt{a^\top \cdot A \cdot a} \leq \sqrt{\|a\|_2 \|A\|_2 \|a\|_2} = \|a\|_2 \sqrt{\|A\|_2}$  with  $a$  to be either  $\phi$  or  $w_h$ . Moreover,  $\lambda_{\min}(\tilde{\Lambda}_h^p) \geq \kappa / \max_{h,s,a} \widehat{\sigma}_h(s, a)^2 \geq \kappa/H^2$  implies  $\left\| (\tilde{\Lambda}_h^p)^{-1} \right\| \leq H^2/\kappa$ .

The second inequality comes from Lemma G.2 with  $R = H$  since  $|\eta_\tau| = |(r_h^\tau + \widehat{V}_{h+1}(s_{h+1}^\tau) - (\mathcal{T}_h \widehat{V}_{h+1})(s_h^\tau, a_h^\tau)) / \widehat{\sigma}_h(s_h^\tau, a_h^\tau)| \leq H$  and  $|x_\tau| = |\phi(s_h^\tau, a_h^\tau) / \widehat{\sigma}_h(s_h^\tau, a_h^\tau)| \leq 1$ .

The final result is obtained by absorbing the term (i) via the condition  $K > \max\{\mathcal{M}_1, \mathcal{M}_2, \mathcal{M}_3, \mathcal{M}_4\}$ .  $\square$
